# Supplementary material for: (thf)2Ln(Ge9{Si(SiMe3)3}3)2 (Ln = Eu, Sm): the first coordination of metalloid germanium clusters to lanthanides
Source: Royal Society of Chemistry journal article supplement (doi:10.1039/d1cc01151k), 2021-01-01
Supplement: d1cc01151k1.pdf [file d1cc01151k1.pdf]

## Supporting Information

### **(thf)<sub>2</sub>Ln(Ge<sub>9</sub>{Si(SiMe<sub>3</sub>)<sub>3</sub>})<sub>2</sub> (Ln = Eu, Sm): the first coordination of germanium metalloid cluster to lanthanides**

Svetlana Klementyeva,\* Claudio Schrenk, Minghui Zhang, Marat M. Khusniyarov and Andreas Schnepf\*

## Table of Contents

|                                                                          |    |
|--------------------------------------------------------------------------|----|
| Experimental Procedures                                                  | 3  |
| Results and Discussion                                                   | 4  |
| UV-Vis spectroscopy                                                      | 4  |
| Crystal data (Tables S1 and S2)                                          | 6  |
| Magnetic measurements                                                    | 8  |
| NMR Spectroscopy                                                         | 10 |
| Quantum chemical calculations                                            | 12 |
| [(thf) <sub>2</sub> Sm(Ge <sub>9</sub> Hyp <sub>3</sub> ) <sub>2</sub> ] | 13 |
| Atomic coordinates                                                       | 13 |
| Shared electron numbers (SENs)                                           | 16 |
| Calculated partial atomic charges                                        | 21 |
| [Sm(Ge <sub>9</sub> Hyp <sub>3</sub> ) <sub>2</sub> ]                    | 23 |
| Atomic coordinates                                                       | 23 |
| [(thf) <sub>2</sub> Eu(Ge <sub>9</sub> Hyp <sub>3</sub> ) <sub>2</sub> ] | 26 |
| Atomic coordinates                                                       | 26 |
| [Eu(Ge <sub>9</sub> Hyp <sub>3</sub> ) <sub>2</sub> ]                    | 29 |
| Atomic coordinates                                                       | 29 |
| References                                                               | 32 |

## Experimental Procedures

### General Considerations

All manipulations of air-sensitive materials were performed with the rigorous exclusion of oxygen and moisture in flame-dried Schlenk-type glassware either on a dual manifold Schlenk line, interfaced to a high vacuum ( $10^{-3}$  torr) line, or in an argon-filled glove box. Elemental analyses were carried out with an Elementar vario MICRO Cube. Tetrahydrofuran was distilled under nitrogen from sodium benzophenoneketyl and degassed before storage over Na/K alloy. *n*-Hexane was distilled under nitrogen from sodium, degassed and stored in vacuo over Na/K alloy.  $(\text{thf})_2\text{SmI}_2$ <sup>[1,2]</sup>,  $(\text{thf})_2\text{EuI}_2$ <sup>[2]</sup> and  $\text{KGe}_9\text{Hyp}_3$ <sup>[3,4]</sup> were prepared according to literature procedures.

NMR spectroscopic measurements were performed by using a Bruker AVIIIHD-300 spectrometer. The chemical shifts are given in ppm against the external standard  $\text{SiMe}_4$ .  $\text{C}_6\text{D}_6$  was dried with Na/K alloy and stored in a glove box under an argon atmosphere. The INEPT pulse program was used for the  $^{29}\text{Si}$  NMR spectroscopic experiments.

UV/Vis measurements were performed using a PG Instruments T60 UV/visible spectrophotometer.

### X-ray diffraction analysis

Crystals of all compounds were mounted on the diffractometer at 150 K. The data were collected using a Bruker APEX II DUO diffractometer equipped with an  $\text{I}\mu\text{S}$  microfocus sealed tube and QUAZAR optics for monochromated  $\text{MoK}\alpha$  radiation ( $\lambda=0.71073$  Å) with an Oxford Cryosystems cryostat. A semiempirical absorption correction was applied by using the program SADABS. The structure was solved by direct methods and refined against  $F^2$  for all observed reflections; the SHELXS and SHELXL<sup>[5]</sup> programs were used within the Olex2 program package.<sup>[6]</sup> The positions of the hydrogen atoms in all compounds were refined using a riding model. In case of  $[(\text{thf})_2\text{Eu}(\text{Ge}_9\text{Hyp}_3)_2]$  (**2**), the co-crystallized solvent molecules could not be refined properly due to a heavy disorder, so the SQUEEZE program routine implemented in the PLATON program package<sup>[7]</sup> was used to identify 3 hexane molecules per cluster in a large void of  $2560$  Å<sup>3</sup>. CCDC 2049433(**2**) and 2049432(**3**) contain the supplementary crystallographic data for this paper. These data can be obtained free of charge from The Cambridge Crystallographic Data Centre.

### Magnetic measurements

Magnetic data on microcrystalline samples were collected with a Quantum Design MPMS 3. DC susceptibility data were collected on samples restrained within a polycarbonate gel capsule. Variable-temperature measurements were performed at the applied magnetic field of 0.1 T with  $1$  K  $\text{min}^{-1}$  heating rate and 5 K intervals. Magnetic susceptibility data were corrected for sample holder and underlying diamagnetism by using an estimation  $\chi_{\text{m,diamag}} = 1/2 M_{\text{w}} \cdot 10^{-6} \text{ cm}^3 \text{ mol}^{-1}$ , with  $M_{\text{w}}$  being the molar mass of the complex.<sup>[8]</sup> The fits were performed using the program PHI version 3.1.5.<sup>[9]</sup>

### Computational studies

Quantum-chemical calculations were carried out with the RI-DFT version<sup>[10]</sup> of the Turbomole<sup>[11]</sup> program package by employing the BP86-functional.<sup>[12]</sup> The basis sets were of TZVPP quality.<sup>[13]</sup> The TmoleX client<sup>[14]</sup> was used as graphical user interface.

### Synthesis of $[(\text{thf})_2\text{Eu}(\text{Ge}_9\text{Hyp}_3)_2]$ (**2**) and $[(\text{thf})_2\text{Sm}(\text{Ge}_9\text{Hyp}_3)_2]$ (**3**)

$(\text{thf})_2\text{LnI}_2$  (1 equiv.) and  $\text{KGe}_9\text{Hyp}_3$  (2 equiv.) were stirred in THF (20 mL) for 48 h at 85°C. Then THF was removed by evaporation in vacuum and the residue was extracted with *n*-hexane (80 mL) under solvothermal conditions at +85°C for 48 h. The *n*-hexane extract was filtered into a two-section ampule, concentrated to 10 mL under vacuum and flame sealed to grow crystals by slow evaporation. The block-shaped crystals were washed with *n*-hexane and dried in vacuum. The residue after filtration was extracted with *n*-hexane one more time and the second crop of crystals was isolated by the same manner. The isolation of compounds **2** and **3** succeed by the solvothermal extraction with a non-polar solvent like *n*-hexane, which seems to be vital to shift the reaction to the product side as within the primary reaction solution in thf a precipitation of a salt is not observed.

**2** (from 42 mg (0.075 mmol) of  $(\text{thf})_2\text{EuI}_2$  and 215 mg (0.15 mmol) of  $\text{KGe}_9\text{Hyp}_3$ ): Orange-brown crystals, first crop 104 mg, second crop 31 mg; yield 135 mg (0.046 mmol; 58%). The reaction mixture was red-orange and the residue was orange-brown in color. Anal. calcd (%) for  $\text{C}_{62}\text{H}_{178}\text{EuGe}_{18}\text{O}_2\text{Si}_{24}$  (3089.46): C 24.10, H 5.81. Found C 23.84, H 5.71.

**3** (from 41 mg (0.075 mmol) of  $(\text{thf})_2\text{SmI}_2$  and 215 mg (0.15 mmol) of  $\text{KGe}_9\text{Hyp}_3$ ): Dark-green crystals, first crop 125 mg, second crop 17 mg; yield 142 mg (0.046 mmol; 61%). The reaction mixture was dark brown-green and the residue was brown-greenish in color. Anal. calcd (%) for  $\text{C}_{62}\text{H}_{178}\text{Ge}_{18}\text{O}_2\text{Si}_{24}\text{Sm}$  (3087.86): C 24.12, H 5.81.

Found C 24.21, H 5.55.  $^1\text{H}$  NMR ( $\text{C}_6\text{D}_6$ , 300 MHz):  $\delta=0.42$  ppm;  $^{13}\text{C}\{^1\text{H}\}$  NMR ( $\text{C}_6\text{D}_6$ , 75 MHz):  $\delta=5.6$  ppm;  $^{29}\text{Si}\{^1\text{H}\}$  NMR ( $\text{C}_6\text{D}_6$ , 60 MHz):  $\delta=-13.7$  ( $-\text{SiMe}_3$ ),  $-94.1$  ppm ( $-\text{Si}(\text{SiMe}_3)_3$ ).

## Results and Discussion

### UV-Vis spectroscopy

**Figure S1.** The UV-Vis spectrum of **2** recorded at room temperature in *n*-hexane solution. The absorption in visible range is shown as insertion.

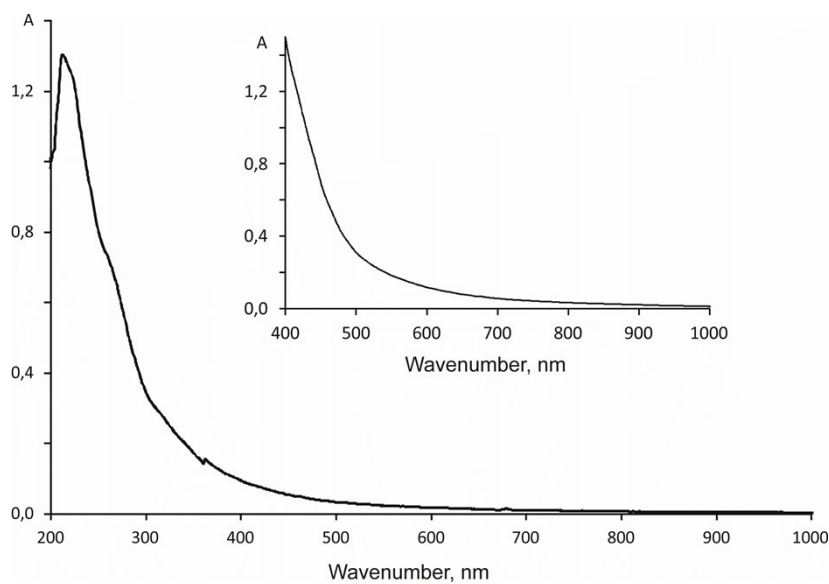

**Figure S2.** The crystals (a) and solution in *n*-hexane (b) of **2**.

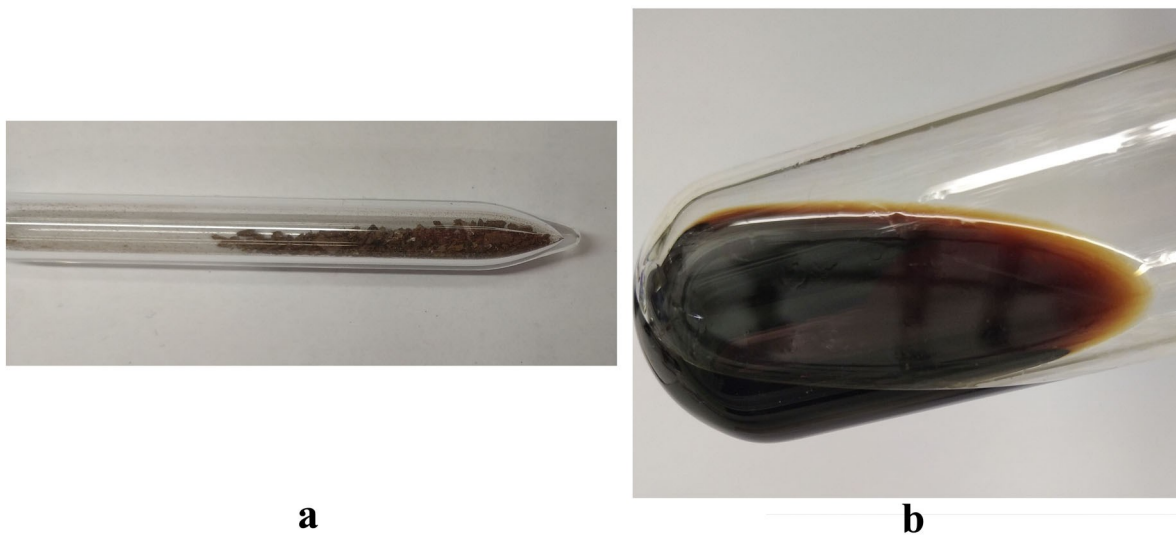

**Figure S3.** The UV-Vis spectrum of **3** recorded at room temperature in *n*-hexane solution. The absorption in visible range is shown as insertion.

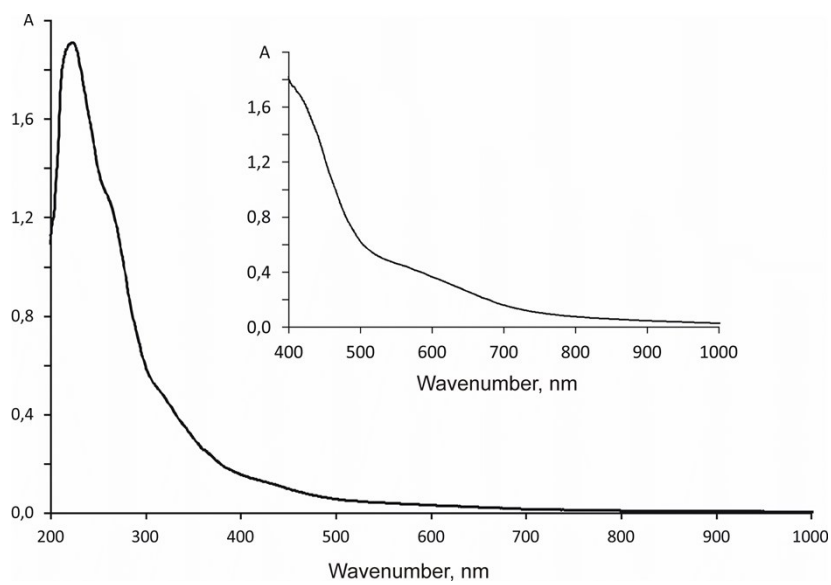

**Figure S4.** The crystals (a) and solution in *n*-hexane (b) of **3**.

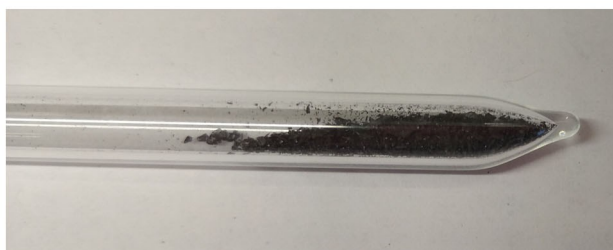

**a**

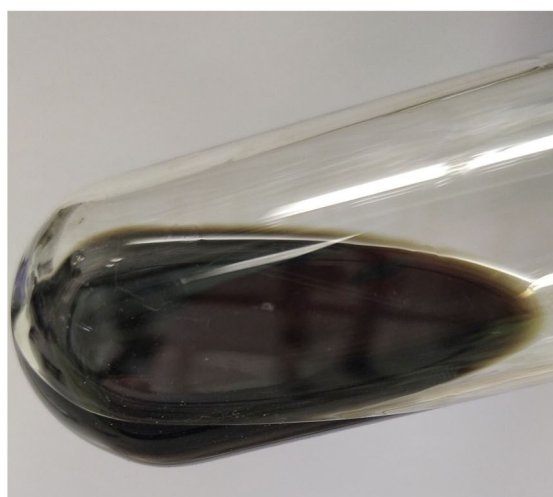

**b**

**Table S1.** Selected Ln-Ge and Ge-Ge distances (pm) for compounds **2**, **3** and the corresponding model compounds together with the calculated 2c-SENs for the two-center Sm-Ge bonds of [(thf)<sub>2</sub>Sm(Ge<sub>9</sub>Hyp<sub>3</sub>)<sub>2</sub>].

|           | Ln-Ge and Ge-Ge distances (pm) |            |                                                                          |                                                                          | 2c-SEN Sm-Ge                                                             |
|-----------|--------------------------------|------------|--------------------------------------------------------------------------|--------------------------------------------------------------------------|--------------------------------------------------------------------------|
|           | <b>2</b>                       | <b>3</b>   | [(thf) <sub>2</sub> Eu(Ge <sub>9</sub> Hyp <sub>3</sub> ) <sub>2</sub> ] | [(thf) <sub>2</sub> Sm(Ge <sub>9</sub> Hyp <sub>3</sub> ) <sub>2</sub> ] | [(thf) <sub>2</sub> Sm(Ge <sub>9</sub> Hyp <sub>3</sub> ) <sub>2</sub> ] |
| Ln-Ge1    | 378.97(15)                     | 379.27(11) | 379.3                                                                    | 385.7                                                                    | 0.1508                                                                   |
| Ln-Ge2    | 342.48(13)                     | 342.97(9)  | 342.5                                                                    | 338.8                                                                    | 0.4460                                                                   |
| Ln-Ge3    | 341.20(13)                     | 342.37(10) | 341.5                                                                    | 334.9                                                                    | 0.3744                                                                   |
| Ln-Ge10   | 335.15(14)                     | 336.49(9)  | 343.2                                                                    | 333.8                                                                    | 0.4610                                                                   |
| Ln-Ge11   | 407.83(14)                     | 405.06(11) | 362.9                                                                    | 365.6                                                                    | 0.2280                                                                   |
| Ln-Ge12   | 345.71(13)                     | 346.10(9)  | 339.0                                                                    | 339.7                                                                    | 0.3898                                                                   |
| Ge1-Ge2   | 269.86(17)                     | 269.58(10) | 279.7                                                                    | 280.0                                                                    |                                                                          |
| Ge1-Ge3   | 269.36(18)                     | 269.10(10) | 275.1                                                                    | 275.0                                                                    |                                                                          |
| Ge2-Ge3   | 271.30(16)                     | 271.62(10) | 270.1                                                                    | 269.6                                                                    |                                                                          |
| Ge10-Ge11 | 271.01(17)                     | 271.04(11) | 274.9                                                                    | 275.1                                                                    |                                                                          |
| Ge11-Ge12 | 274.07(16)                     | 273.40(10) | 278.7                                                                    | 278.7                                                                    |                                                                          |
| Ge10-Ge12 | 267.08(17)                     | 267.64(10) | 270.4                                                                    | 270.3                                                                    |                                                                          |

**Table S2.** Crystal data and structure refinement for **2** and **3**

| Identification code                         | <b>2</b>                                                                            | <b>3</b>                                                                             |
|---------------------------------------------|-------------------------------------------------------------------------------------|--------------------------------------------------------------------------------------|
| Empirical formula                           | C <sub>62</sub> H <sub>178</sub> EuGe <sub>18</sub> O <sub>2</sub> Si <sub>24</sub> | C <sub>74</sub> H <sub>206</sub> Ge <sub>18</sub> O <sub>2</sub> Si <sub>24</sub> Sm |
| Formula weight                              | 3088.77                                                                             | 3259.51                                                                              |
| Temperature/K                               | 150                                                                                 | 150                                                                                  |
| Crystal system                              | monoclinic                                                                          | monoclinic                                                                           |
| Space group                                 | P2 <sub>1</sub> /c                                                                  | P2 <sub>1</sub> /c                                                                   |
| a/Å                                         | 22.778(3)                                                                           | 22.788(5)                                                                            |
| b/Å                                         | 24.085(3)                                                                           | 24.181(5)                                                                            |
| c/Å                                         | 29.746(4)                                                                           | 29.737(6)                                                                            |
| α/°                                         | 90                                                                                  | 90                                                                                   |
| β/°                                         | 112.419(2)                                                                          | 112.337(2)                                                                           |
| γ/°                                         | 90                                                                                  | 90                                                                                   |
| Volume/Å <sup>3</sup>                       | 15085(3)                                                                            | 15157(5)                                                                             |
| Z                                           | 4                                                                                   | 4                                                                                    |
| ρ <sub>calc</sub> /cm <sup>3</sup>          | 1.360                                                                               | 1.428                                                                                |
| μ/mm <sup>-1</sup>                          | 4.152                                                                               | 4.110                                                                                |
| F(000)                                      | 6164.0                                                                              | 6560.0                                                                               |
| Crystal size/mm <sup>3</sup>                | 0.388 × 0.175 × 0.077                                                               | 0.252 × 0.224 × 0.038                                                                |
| Radiation                                   | MoKα (λ = 0.71073)                                                                  | MoKα (λ = 0.71073)                                                                   |
| 2θ range for data collection/°              | 3.318 to 49                                                                         | 2.566 to 52.982                                                                      |
| Index ranges                                | -26 ≤ h ≤ 23, -28 ≤ k ≤ 28, -34 ≤ l ≤ 34                                            | -28 ≤ h ≤ 28, -30 ≤ k ≤ 30, -37 ≤ l ≤ 37                                             |
| Reflections collected                       | 84484                                                                               | 250840                                                                               |
| Independent reflections                     | 25095 [R <sub>int</sub> = 0.1267, R <sub>sigma</sub> = 0.1341]                      | 31226 [R <sub>int</sub> = 0.1136, R <sub>sigma</sub> = 0.0693]                       |
| Data/restraints/parameters                  | 25095/0/1018                                                                        | 31226/363/1183                                                                       |
| Goodness-of-fit on F <sup>2</sup>           | 1.017                                                                               | 1.018                                                                                |
| Final R indexes [I ≥ 2σ (I)]                | R <sub>1</sub> = 0.0602, wR <sub>2</sub> = 0.1345                                   | R <sub>1</sub> = 0.0488, wR <sub>2</sub> = 0.1037                                    |
| Final R indexes [all data]                  | R <sub>1</sub> = 0.1435, wR <sub>2</sub> = 0.1789                                   | R <sub>1</sub> = 0.1029, wR <sub>2</sub> = 0.1262                                    |
| Largest diff. peak/hole / e Å <sup>-3</sup> | 1.13/-0.90                                                                          | 1.13/-0.67                                                                           |
| CCDC number                                 | 2049433                                                                             | 2049432                                                                              |

## Magnetic measurements

**Figure S5.** Field-dependent reduced magnetization of **2** measured on a crystalline sample at 2 K. Red curve is the best fit obtained for an  $S = 7/2$  system.

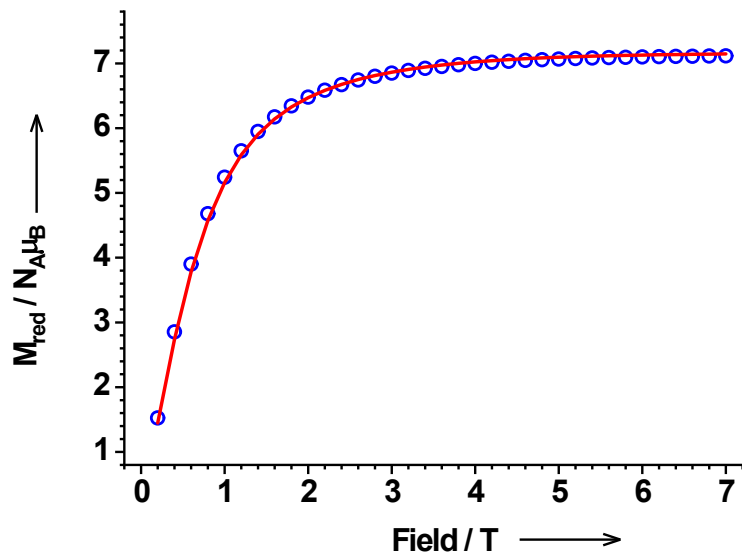

**Figure S6.** Field-dependent reduced magnetization of **3** measured on a microcrystalline sample at 2 K.

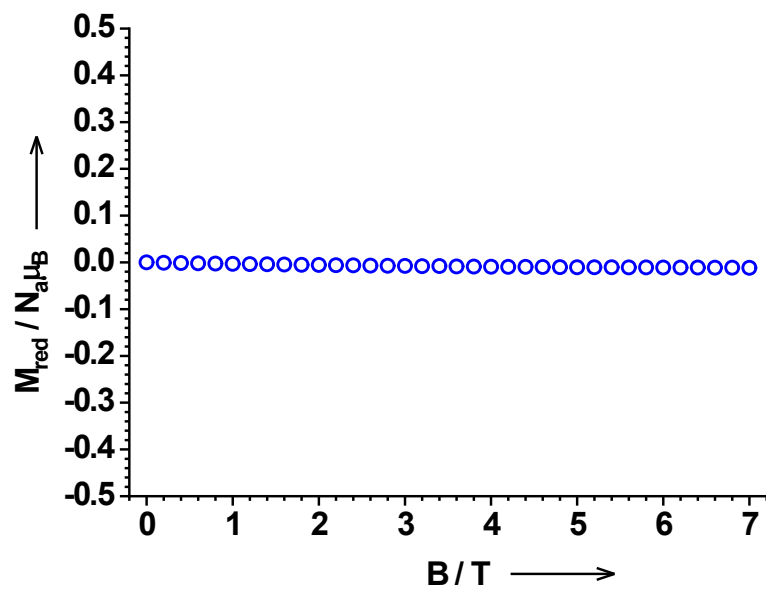



**Figure S7.** Variable-temperature effective magnetic moment of **2** measured on a microcrystalline sample at external magnetic field of 0.1 T. Red curve is the best fit obtained for an  $S = 7/2$  system.

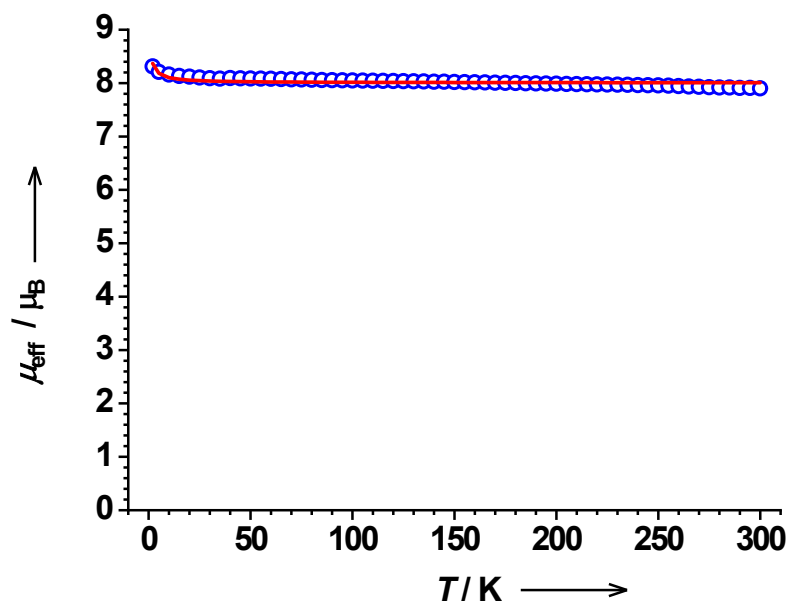

**Figure S8.** Variable-temperature effective magnetic moment of **3** measured on a microcrystalline sample at external magnetic field of 0.1 T.

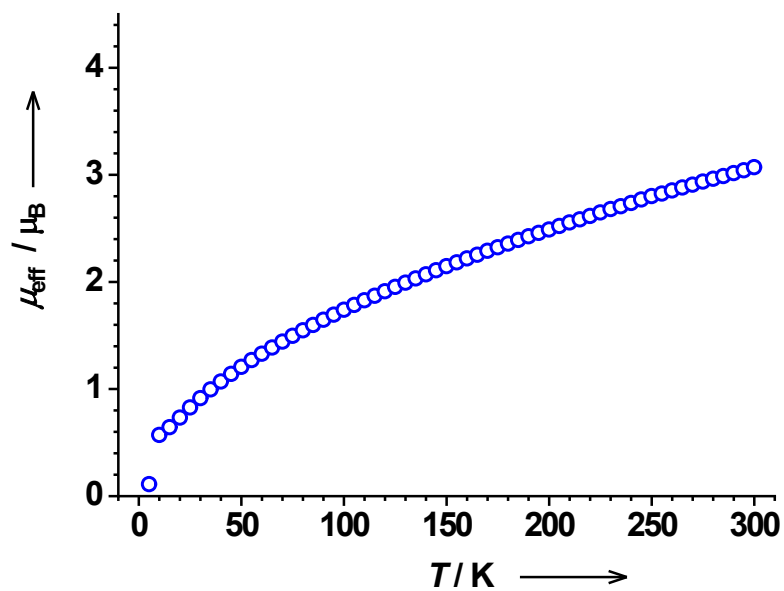

## NMR Spectroscopy

Figure S9.  $^1\text{H}$  NMR spectrum of **3** in  $\text{C}_6\text{D}_6$ .

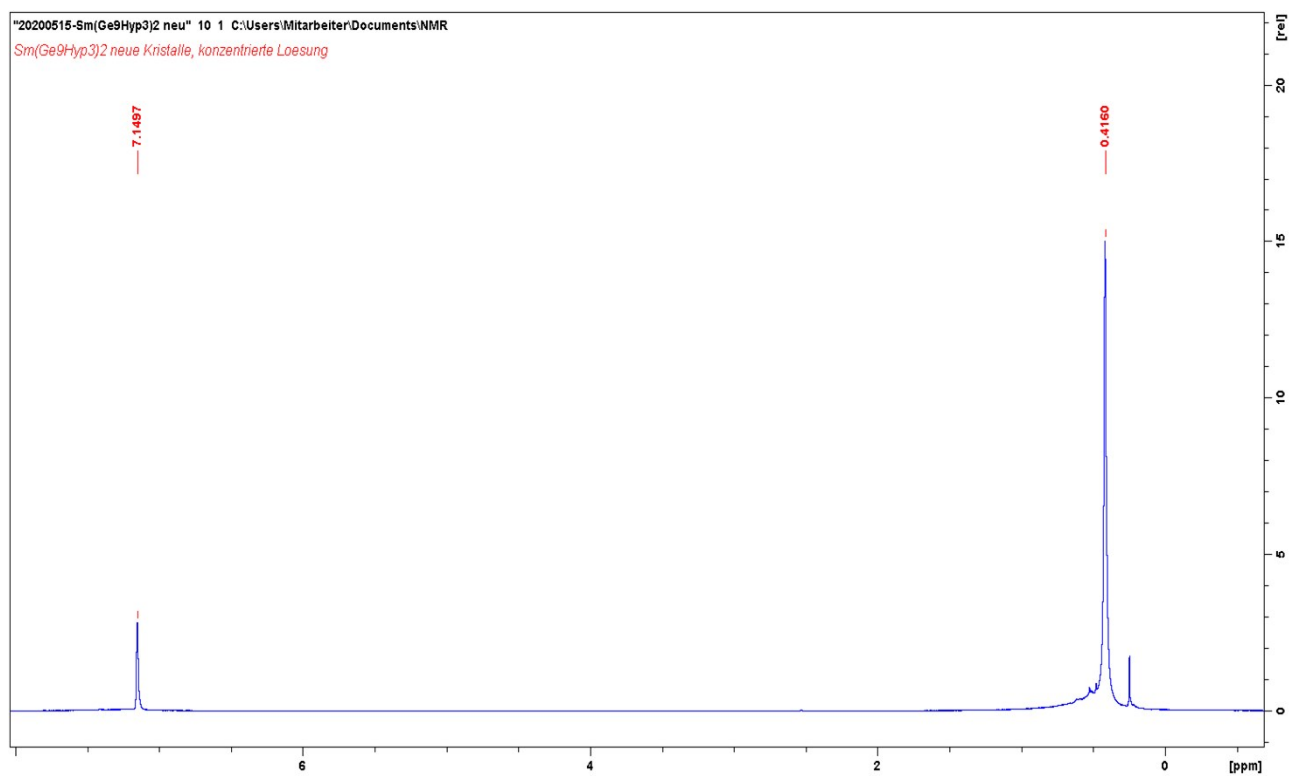

Figure S10.  $^{13}\text{C}$  NMR spectrum of **3** in  $\text{C}_6\text{D}_6$ .

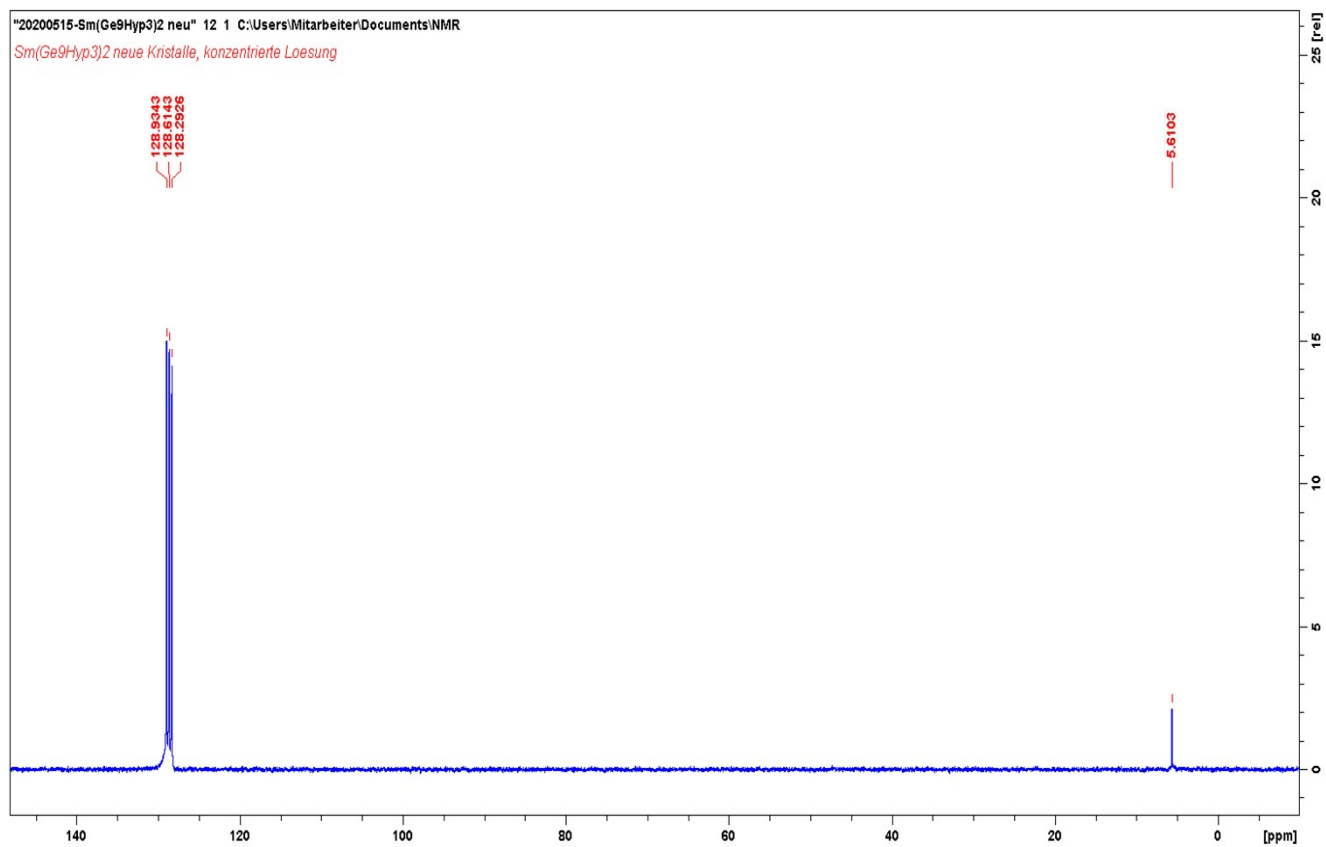

Figure S11.  $^{29}\text{Si}$  NMR spectrum of **3** in  $\text{C}_6\text{D}_6$ .

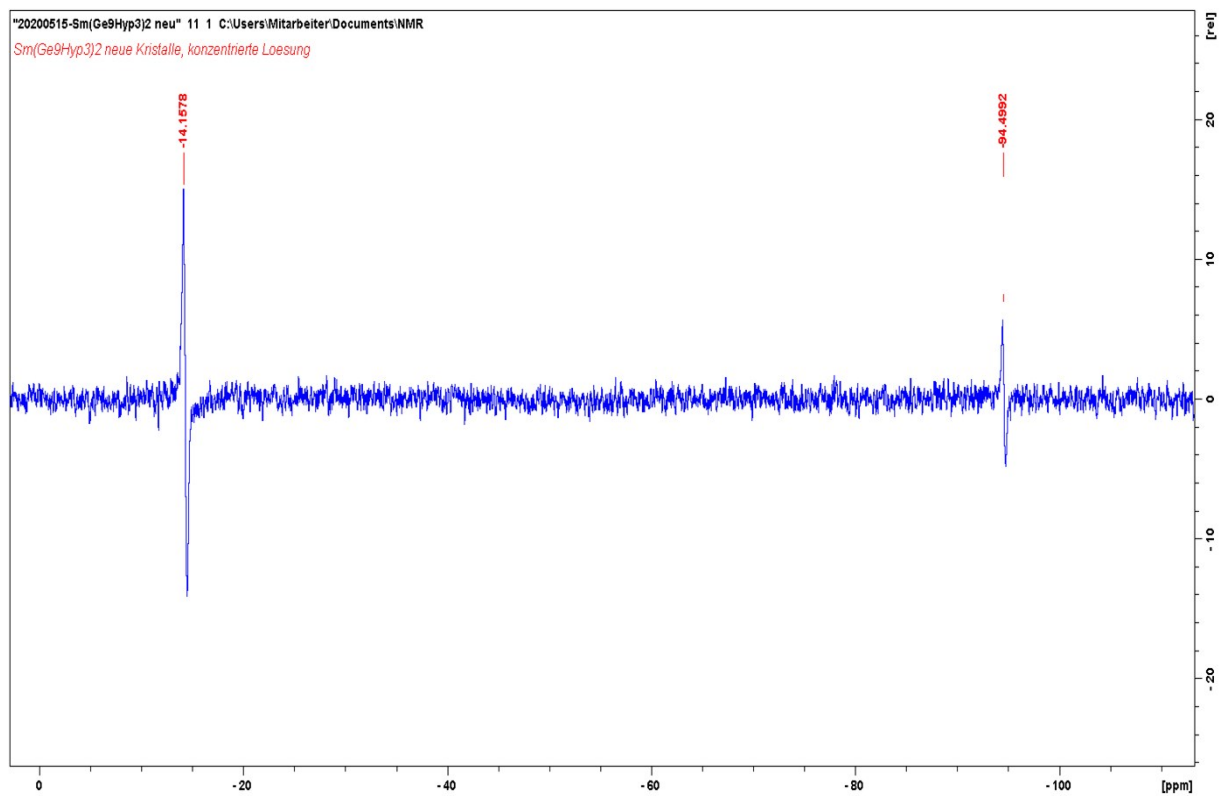

## Quantum chemical calculations

In order to see how the coordinated thf molecules influence the structures we performed additional theoretical studies on model compounds with no coordinating thf molecules  $[\text{Ln}(\text{Ge}_9\text{Hyp}_3)_2]$  ( $\text{Ln} = \text{Eu}, \text{Sm}$ ). Thereby, in case of the model compounds without thf molecules, within the minimum structure the bonding mode of the  $\text{Ge}_9(\text{Hyp})_3$  units changes to an  $\eta^3$ -coordination mode of both  $\text{Ge}_9$  units similar to the transition metal clusters  $[\text{Hyp}_3\text{Ge}_9\text{-M-Ge}_9\text{Hyp}_3]$ . The central lanthanide atoms are now bound trigonal antiprismatic to six germanium atoms and the six Hyp-substituents are arranged in a staggered conformation. Hence, removing the thf molecules from **2** or **3** leads to a structural reorganization and a linear arrangement of the two  $\text{Ge}_9(\text{Hyp})_3$  units around the central lanthanide atom. This is in contrast to most of the base-free lanthanocenes, which still exhibit a bent structure,<sup>[15]</sup> and only some of them with bulky Cp-ligands adopt centrosymmetric sandwich-type structure with strictly parallel Cp-rings.<sup>[15a, 16]</sup> Additionally, the presence of coordinating thf molecules within **2** and **3** indicates that the bonding of the thf molecules is more favorable than the coordination of the third germanium atom of the  $\text{Ge}_3$ -ring of the  $\text{Ge}_9(\text{Hyp})_3$  unit. This aspect is also supported by quantum chemical calculations showing that the elimination of two thf molecules according to Scheme 1 is endotherm by 54.9 and 55.0 kJ/mol for europium and samarium, respectively.

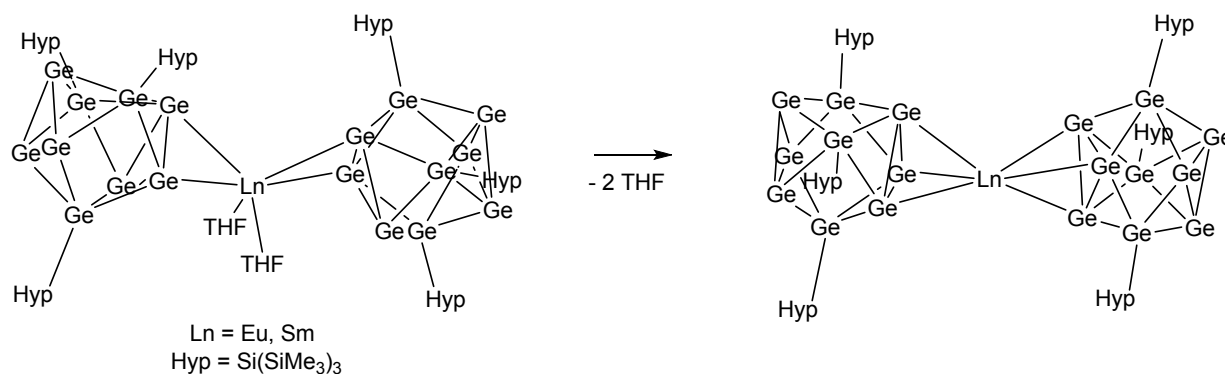

Scheme S1

# 1. [(thf)<sub>2</sub>Sm(Ge<sub>9</sub>Hyp<sub>3</sub>)<sub>2</sub>]

Figure S12. Geometry optimized structure

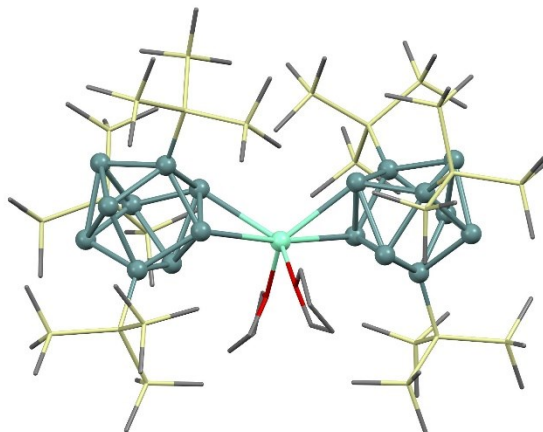

Point group: C1

Energy: -47620.90874005162 Hartree

HOMO-LUMO-gap: 0.472 eV

## Atomic coordinates:

|                                  |                                  |
|----------------------------------|----------------------------------|
| Sm 12.523533 13.384653 8.687329  | Si 16.135619 18.772676 11.374557 |
| Ge 15.318751 14.051069 6.967218  | Ge 7.563022 9.413657 6.806220    |
| Ge 15.534925 14.650437 9.587343  | Ge 9.247212 7.561285 7.662170    |
| Ge 9.806292 11.907427 7.281739   | Si 10.594067 9.247338 3.871189   |
| Ge 11.687436 10.191762 8.189748  | Ge 7.735537 8.863993 9.486189    |
| O 12.181894 13.794736 11.121924  | Si 5.674048 12.558852 9.043192   |
| O 11.113768 15.373612 8.146886   | Si 10.998312 7.144152 11.522990  |
| C 15.680109 10.546958 9.710812   | C 17.586746 11.270637 12.004002  |
| C 11.037450 14.408654 11.804124  | C 18.101171 8.732220 10.332773   |
| C 12.980052 13.037276 12.096202  | Si 12.932693 9.624458 3.608600   |
| C 10.612662 15.610772 6.782319   | Si 16.975243 19.131083 3.308647  |
| C 10.986443 16.609268 8.928694   | Si 16.910573 15.375021 2.142224  |
| Ge 14.533977 16.553819 7.794556  | Si 13.566554 17.203644 3.093778  |
| Ge 16.205303 16.193402 5.836462  | Si 20.929657 12.372972 9.666933  |
| Ge 17.579892 13.854079 8.224428  | Si 19.066092 10.655940 6.648817  |
| Ge 16.295681 17.104197 9.610707  | Si 17.719568 20.503411 10.899292 |
| Ge 9.874524 11.223760 9.982750   | Si 16.678796 17.664967 13.418037 |
| Ge 10.100322 9.555721 6.240672   | Si 13.931095 19.672384 11.424492 |
| Ge 7.690883 11.270959 8.595031   | Si 10.017525 6.990877 3.316482   |
| Ge 10.299909 8.668673 9.750582   | Si 9.306930 10.809307 2.600550   |
| Si 17.500358 10.535295 10.253430 | Si 6.151655 14.137497 10.758800  |
| C 13.408624 11.254075 4.454067   | Si 3.957460 11.049477 9.751472   |
| C 11.029090 13.825934 13.212700  | Si 5.038960 13.632259 7.005131   |
| C 12.513797 13.522207 13.461448  | Si 12.696248 5.756254 10.575027  |
| C 9.826866 16.911002 6.862906    | Si 9.114411 5.816053 12.173308   |
| C 10.596310 17.695601 7.934234   | Si 11.792953 8.342989 13.421420  |
| Ge 18.615100 15.562063 6.564347  | C 13.933333 8.220787 4.403505    |
| Ge 17.416824 17.834171 7.418944  | C 13.405316 9.734615 1.768708    |
| Si 15.893050 17.012065 3.557740  | C 18.775447 19.097894 3.902736   |
| Ge 18.606209 16.054277 9.155089  | C 16.046709 20.484546 4.263801   |
| Si 18.804820 11.809019 8.723336  | C 16.982667 19.596347 1.461651   |

C 18.801474 15.543353 2.173917  
C 16.323485 15.586055 0.343467  
C 16.450845 13.628214 2.719557  
C 12.706502 18.277848 4.403314  
C 12.766909 15.480131 3.102453  
C 13.252683 17.996058 1.392851  
C 20.765672 13.432760 11.232064  
C 21.998466 13.313393 8.411357  
C 21.833873 10.768127 10.150272  
C 19.823818 11.791430 5.331766  
C 17.375488 10.058809 6.023584  
C 20.199144 9.138559 6.842871  
C 17.126251 21.582900 9.454681  
C 19.431161 19.809480 10.472243  
C 17.900446 21.607297 12.440478  
C 18.523322 17.224852 13.465389  
C 16.275978 18.769845 14.914807  
C 15.670515 16.063596 13.582153  
C 13.837342 21.206371 12.545634  
C 12.717296 18.373952 12.110191  
C 13.365764 20.171039 9.683626  
C 8.145768 6.706521 3.454618  
C 10.897132 5.742924 4.442161  
C 10.543808 6.635556 1.520998  
C 7.452130 10.645658 2.965217  
C 9.558237 10.533290 0.733434  
C 9.835171 12.586208 3.015550  
C 7.373237 15.437272 10.093585  
C 6.942071 13.291286 12.262312  
C 4.582119 15.041585 11.339247  
C 2.295851 11.980467 9.755941  
C 4.291728 10.413958 11.508327  
C 3.800191 9.563521 8.585729  
C 4.277563 12.379237 5.800879  
C 3.759769 15.002951 7.335721  
C 6.550298 14.424892 6.174327  
C 13.613502 4.795808 11.938975  
C 13.960564 6.800651 9.622068  
C 11.928782 4.505268 9.371035  
C 7.886288 6.842548 13.196209  
C 8.194525 5.066901 10.694541  
C 9.733249 4.372969 13.251732  
C 11.948275 7.206298 14.939166  
C 10.607493 9.759668 13.862320  
C 13.512506 9.076421 13.073536  
H 17.482874 9.608591 5.025036  
H 16.938056 9.300660 6.687163  
H 16.662842 10.891722 5.944750  
H 22.219198 12.701071 7.526707  
H 22.957422 13.596523 8.871626  
H 21.503414 14.233182 8.070495  
H 17.564360 18.879677 0.865893  
H 17.445192 20.587203 1.334312  
H 15.970803 19.641737 1.037712  
H 22.829532 11.012210 10.551408  
H 21.973524 10.093586 9.295291  
H 21.288313 10.215808 10.927530  
H 17.317183 12.335513 12.001720  
H 18.592759 11.179152 12.435615  
H 16.888032 10.741433 12.669848  
H 2.969057 8.920593 8.914111  
H 3.602870 9.870908 7.550498  
H 4.716338 8.957212 8.585911  
H 20.243478 8.586657 5.891512  
H 21.225538 9.430604 7.104086  
H 19.839342 8.446846 7.616232  
H 11.619744 18.288511 4.229065  
H 13.063448 19.315692 4.373052

H 12.898657 17.891550 5.414384  
H 14.135074 5.470516 12.631655  
H 14.369518 4.136577 11.485428  
H 12.932943 4.167586 12.529099  
H 11.003383 10.345673 14.706308  
H 10.461973 10.431700 13.003971  
H 9.618420 9.380180 14.151097  
H 12.858443 12.107874 4.036492  
H 13.191141 11.206419 5.531223  
H 14.484257 11.452071 4.337345  
H 16.844979 14.865805 -0.305350  
H 16.532049 16.593763 -0.041163  
H 15.244929 15.403482 0.242425  
H 9.796732 17.428520 5.897052  
H 8.793272 16.719936 7.182651  
H 18.840083 18.886487 4.979103  
H 19.368517 18.339806 3.375195  
H 19.240958 20.079517 3.723496  
H 18.327590 21.053318 13.287634  
H 16.941476 22.032939 12.764995  
H 18.579706 22.443727 12.215286  
H 10.435773 12.902864 13.242374  
H 10.608449 14.530091 13.940769  
H 7.749436 5.843251 10.057674  
H 8.854827 4.456073 10.065568  
H 7.380411 4.421695 11.059868  
H 14.711946 6.147765 9.152723  
H 14.488229 7.506244 10.277498  
H 13.472485 7.382895 8.828430  
H 9.183287 13.303380 2.493838  
H 10.870390 12.787735 2.710188  
H 9.757825 12.775929 4.095350  
H 10.614712 10.600502 0.442876  
H 9.003335 11.297129 0.167279  
H 9.184868 9.549992 0.416799  
H 19.192377 15.479380 3.199094  
H 19.133964 16.497698 1.743199  
H 19.260038 14.733276 1.586636  
H 3.330274 11.975427 6.182793  
H 4.956020 11.534640 5.617766  
H 4.069665 12.862057 4.833915  
H 11.332335 5.008296 8.596863  
H 12.721929 3.932480 8.866779  
H 11.276186 3.788835 9.888356  
H 4.176213 15.806007 7.959221  
H 2.864367 14.615419 7.839685  
H 3.440304 15.452387 6.383096  
H 7.529577 7.714251 12.630682  
H 8.332283 7.201143 14.133901  
H 7.011267 6.227204 13.455586  
H 7.224970 14.041363 13.016497  
H 6.251271 12.581449 12.736141  
H 7.842285 12.730055 11.972377  
H 2.317837 12.868376 10.401852  
H 1.501600 11.314869 10.127282  
H 2.010006 12.305255 8.746218  
H 11.493243 18.158272 7.501195  
H 9.994569 18.482018 8.405862  
H 13.800151 7.272114 3.866026  
H 13.639550 8.062968 5.450077  
H 15.004776 8.469852 4.387786  
H 12.765550 11.967530 11.951861  
H 14.036067 13.243266 11.877419  
H 14.456010 22.026242 12.156283  
H 12.799819 21.569962 12.600129  
H 14.171824 20.989218 13.568912  
H 21.767464 13.666594 11.623856  
H 20.256243 14.383070 11.018861

H 20.204116 12.917030 12.021832  
H 15.031978 20.638313 3.871845  
H 15.967250 20.233684 5.330193  
H 16.586617 21.440092 4.180719  
H 17.973942 8.218836 9.370181  
H 19.162451 8.669990 10.609247  
H 17.524773 8.175536 11.086786  
H 10.016951 14.732950 6.501654  
H 11.481899 15.702081 6.114061  
H 10.133412 14.167563 11.229060  
H 11.200474 15.496040 11.813954  
H 15.845787 15.399001 12.724974  
H 14.594614 16.280087 13.627490  
H 15.951553 15.525632 14.500325  
H 7.583096 7.334014 2.750358  
H 7.910502 5.655080 3.229525  
H 7.780060 6.926037 4.467047  
H 15.201521 18.990593 14.978921  
H 16.813302 19.726505 14.874419  
H 16.567533 18.260044 15.845741  
H 13.153626 14.859528 2.282322  
H 11.676521 15.555617 2.975815  
H 12.967843 14.946710 4.041843  
H 18.815080 16.634284 12.586115  
H 18.749536 16.631396 14.364110  
H 19.152873 18.124752 13.491417  
H 6.908262 16.054902 9.312253  
H 7.704101 16.109479 10.900130  
H 8.256167 14.949247 9.656452  
H 13.111981 8.833091 1.213806  
H 12.932326 10.597731 1.281421  
H 14.495187 9.850610 1.669013  
H 11.952705 16.797994 9.415472  
H 10.204098 16.448350 9.683407  
H 7.242109 10.753468 4.038286  
H 7.060004 9.670233 2.648035  
H 6.894630 11.425649 2.424508  
H 10.387012 3.697231 12.683402  
H 10.288865 4.717701 14.133559  
H 8.873603 3.782675 13.604403  
H 15.068666 9.952663 10.405687  
H 15.539840 10.139802 8.701308  
H 15.303011 11.581640 9.713604  
H 12.669676 12.762452 14.236407

H 13.059663 14.429345 13.754195  
H 4.270698 11.226346 12.247603  
H 5.269023 9.916327 11.571911  
H 3.521138 9.681685 11.793031  
H 12.380661 7.765645 15.783005  
H 10.970515 6.822923 15.260995  
H 12.599282 6.344414 14.740308  
H 10.603809 4.720559 4.158807  
H 11.989516 5.816654 4.363758  
H 10.622141 5.893746 5.495358  
H 3.867743 14.346190 11.801086  
H 4.069003 15.548921 10.511597  
H 4.840075 15.801020 12.092996  
H 10.255200 5.608945 1.248905  
H 11.631089 6.721888 1.390642  
H 10.064677 7.318750 0.807321  
H 14.256793 8.285703 12.907500  
H 13.502170 9.714414 12.179489  
H 13.855561 9.683379 13.925388  
H 16.937953 12.878199 2.078450  
H 16.775588 13.455499 3.754711  
H 15.366816 13.459647 2.677270  
H 7.318603 13.671513 5.953890  
H 7.003006 15.189482 6.820281  
H 6.258178 14.906802 5.229166  
H 20.135820 20.640248 10.313515  
H 19.831058 19.174344 11.273703  
H 19.405729 19.209492 9.552260  
H 11.677483 18.717956 12.003313  
H 12.899624 18.186744 13.177742  
H 12.823736 17.417727 11.579026  
H 12.172347 18.010363 1.181635  
H 13.745708 17.443751 0.581925  
H 13.610522 19.034123 1.358181  
H 14.000309 20.964756 9.267493  
H 13.413076 19.316532 8.993269  
H 12.330447 20.543775 9.708041  
H 17.882136 22.350489 9.229338  
H 16.974582 20.982955 8.546783  
H 16.184283 22.098872 9.685868  
H 20.833619 12.122093 5.609017  
H 19.212688 12.691591 5.179762  
H 19.894126 11.258659 4.371221

**Results of the Ahlrichs-Heinzmann population analysis:  
calculated shared electron numbers (SEN)**

**Figure S13.** Atom numbers for calculated structure

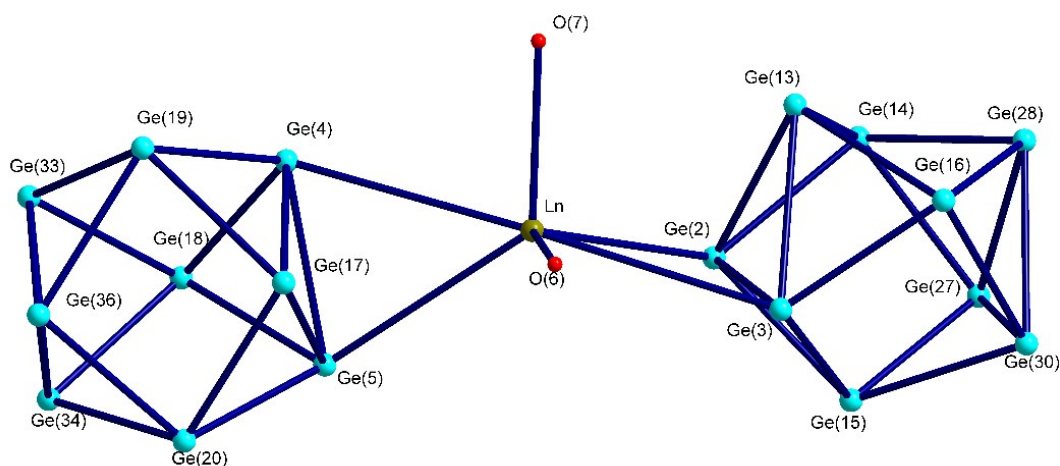

**TWO center shared electron numbers ge 0.1000E-01 :**

|                                     |                |         |
|-------------------------------------|----------------|---------|
| shared electron number for the pair | 1 sm - 2 ge =  | 0.4460  |
| shared electron number for the pair | 1 sm - 3 ge =  | 0.3744  |
| shared electron number for the pair | 1 sm - 4 ge =  | 0.3898  |
| shared electron number for the pair | 1 sm - 5 ge =  | 0.4610  |
| shared electron number for the pair | 1 sm - 13 ge = | 0.1508  |
| shared electron number for the pair | 1 sm - 17 ge = | 0.2280  |
| shared electron number for the pair | 2 ge - 3 ge =  | 1.0144  |
| shared electron number for the pair | 2 ge - 13 ge = | 0.9105  |
| shared electron number for the pair | 2 ge - 14 ge = | 1.0069  |
| shared electron number for the pair | 2 ge - 15 ge = | 0.9920  |
| shared electron number for the pair | 2 ge - 16 ge = | -0.0104 |
| shared electron number for the pair | 2 ge - 27 ge = | 0.1320  |
| shared electron number for the pair | 2 ge - 28 ge = | -0.0249 |
| shared electron number for the pair | 2 ge - 30 ge = | -0.0306 |
| shared electron number for the pair | 3 ge - 13 ge = | 0.8422  |
| shared electron number for the pair | 3 ge - 15 ge = | 1.0251  |
| shared electron number for the pair | 3 ge - 16 ge = | 1.0124  |
| shared electron number for the pair | 3 ge - 27 ge = | -0.0290 |
| shared electron number for the pair | 3 ge - 28 ge = | -0.0229 |
| shared electron number for the pair | 3 ge - 30 ge = | 0.2492  |
| shared electron number for the pair | 4 ge - 5 ge =  | 1.0007  |
| shared electron number for the pair | 4 ge - 17 ge = | 0.8775  |
| shared electron number for the pair | 4 ge - 18 ge = | 1.0079  |
| shared electron number for the pair | 4 ge - 19 ge = | 1.0262  |



|                                     |                 |         |
|-------------------------------------|-----------------|---------|
| shared electron number for the pair | 4 ge - 33 ge =  | 0.2641  |
| shared electron number for the pair | 4 ge - 34 ge =  | -0.0290 |
| shared electron number for the pair | 4 ge - 36 ge =  | -0.0222 |
| shared electron number for the pair | 5 ge - 17 ge =  | 0.9310  |
| shared electron number for the pair | 5 ge - 18 ge =  | 1.0119  |
| shared electron number for the pair | 5 ge - 20 ge =  | 1.0049  |
| shared electron number for the pair | 5 ge - 33 ge =  | -0.0278 |
| shared electron number for the pair | 5 ge - 34 ge =  | 0.1366  |
| shared electron number for the pair | 5 ge - 36 ge =  | -0.0272 |
| shared electron number for the pair | 13 ge - 14 ge = | 1.0226  |
| shared electron number for the pair | 13 ge - 16 ge = | 1.0303  |
| shared electron number for the pair | 13 ge - 27 ge = | -0.0267 |
| shared electron number for the pair | 13 ge - 28 ge = | 0.4284  |
| shared electron number for the pair | 13 ge - 30 ge = | -0.0234 |
| shared electron number for the pair | 14 ge - 15 ge = | 0.0446  |
| shared electron number for the pair | 14 ge - 27 ge = | 1.0087  |
| shared electron number for the pair | 14 ge - 28 ge = | 1.0310  |
| shared electron number for the pair | 15 ge - 16 ge = | 0.0201  |
| shared electron number for the pair | 15 ge - 27 ge = | 1.0182  |
| shared electron number for the pair | 15 ge - 30 ge = | 1.0212  |
| shared electron number for the pair | 16 ge - 27 ge = | -0.0109 |
| shared electron number for the pair | 16 ge - 28 ge = | 1.0418  |
| shared electron number for the pair | 16 ge - 30 ge = | 1.0296  |
| shared electron number for the pair | 17 ge - 19 ge = | 1.0416  |
| shared electron number for the pair | 17 ge - 20 ge = | 1.0204  |
| shared electron number for the pair | 17 ge - 33 ge = | -0.0235 |
| shared electron number for the pair | 17 ge - 34 ge = | -0.0279 |
| shared electron number for the pair | 17 ge - 36 ge = | 0.3891  |
| shared electron number for the pair | 18 ge - 19 ge = | 0.0167  |
| shared electron number for the pair | 18 ge - 20 ge = | 0.0429  |
| shared electron number for the pair | 18 ge - 33 ge = | 1.0117  |
| shared electron number for the pair | 18 ge - 34 ge = | 1.0325  |
| shared electron number for the pair | 19 ge - 33 ge = | 1.0229  |
| shared electron number for the pair | 19 ge - 34 ge = | -0.0107 |
| shared electron number for the pair | 19 ge - 36 ge = | 1.0510  |
| shared electron number for the pair | 20 ge - 34 ge = | 1.0234  |
| shared electron number for the pair | 20 ge - 36 ge = | 1.0262  |
| shared electron number for the pair | 27 ge - 28 ge = | 0.9703  |
| shared electron number for the pair | 27 ge - 30 ge = | 1.0982  |
| shared electron number for the pair | 28 ge - 30 ge = | 0.9009  |
| shared electron number for the pair | 33 ge - 34 ge = | 1.0799  |
| shared electron number for the pair | 33 ge - 36 ge = | 0.9291  |
| shared electron number for the pair | 34 ge - 36 ge = | 0.9787  |

### THREE and FOUR center SEN greater than 0.010:

|                |         |                 |         |                 |         |
|----------------|---------|-----------------|---------|-----------------|---------|
| n( 1 2 3 ) =   | 0.1678  | n( 1 2 13 14) = | -0.0138 | n( 1 3 15 ) =   | -0.0248 |
| n( 1 2 3 4) =  | -0.0268 | n( 1 2 13 17) = | -0.0180 | n( 1 3 15 30) = | -0.0125 |
| n( 1 2 3 5) =  | -0.0202 | n( 1 2 14 ) =   | -0.0358 | n( 1 3 16 ) =   | -0.0354 |
| n( 1 2 3 13) = | 0.0701  | n( 1 2 14 27) = | -0.0150 | n( 1 3 16 30) = | -0.0157 |
| n( 1 2 3 14) = | -0.0192 | n( 1 2 15 ) =   | -0.0232 | n( 1 3 17 ) =   | -0.0492 |
| n( 1 2 3 15) = | -0.0122 | n( 1 2 15 27) = | -0.0120 | n( 1 3 30 ) =   | -0.0320 |
| n( 1 2 3 16) = | -0.0184 | n( 1 2 17 ) =   | -0.0701 | n( 1 4 5 ) =    | 0.1712  |
| n( 1 2 3 17) = | -0.0231 | n( 1 2 27 ) =   | -0.0256 | n( 1 4 5 13) =  | -0.0138 |
| n( 1 2 3 30) = | -0.0101 | n( 1 3 4 ) =    | -0.1215 | n( 1 4 5 17) =  | 0.0884  |
| n( 1 2 4 ) =   | -0.0448 | n( 1 3 4 5) =   | -0.0328 | n( 1 4 5 18) =  | -0.0120 |
| n( 1 2 4 5) =  | -0.0164 | n( 1 3 4 13) =  | -0.0193 | n( 1 4 5 19) =  | -0.0169 |
| n( 1 2 4 13) = | -0.0141 | n( 1 3 4 17) =  | -0.0296 | n( 1 4 5 20) =  | -0.0181 |
| n( 1 2 4 17) = | -0.0228 | n( 1 3 5 ) =    | -0.0628 | n( 1 4 5 33) =  | -0.0103 |
| n( 1 2 5 ) =   | -0.0401 | n( 1 3 5 13) =  | -0.0225 | n( 1 4 13 ) =   | -0.0267 |
| n( 1 2 5 13) = | -0.0197 | n( 1 3 5 17) =  | -0.0218 | n( 1 4 13 17) = | -0.0119 |
| n( 1 2 5 17) = | -0.0213 | n( 1 3 13 ) =   | 0.0810  | n( 1 4 17 ) =   | 0.1091  |
| n( 1 2 6 ) =   | -0.0436 | n( 1 3 13 16) = | -0.0112 | n( 1 4 17 19) = | -0.0135 |
| n( 1 2 13 ) =  | 0.0982  | n( 1 3 13 17) = | -0.0155 | n( 1 4 17 20) = | -0.0104 |

|                  |         |                  |         |                  |         |
|------------------|---------|------------------|---------|------------------|---------|
| n( 1 4 18) =     | -0.0241 | n( 2 14 42) =    | -0.0225 | n( 4 17 20 34) = | 0.0147  |
| n( 1 4 18 33) =  | -0.0127 | n( 2 15 16 30) = | 0.0116  | n( 4 17 20 38) = | -0.0214 |
| n( 1 4 19) =     | -0.0347 | n( 2 15 27) =    | -0.1025 | n( 4 17 33 34) = | 0.0112  |
| n( 1 4 19 33) =  | -0.0139 | n( 2 15 28 30) = | 0.0137  | n( 4 17 33 36) = | 0.0395  |
| n( 1 4 33) =     | -0.0315 | n( 2 15 30) =    | -0.0607 | n( 4 17 34 36) = | 0.0116  |
| n( 1 5 7) =      | -0.0489 | n( 2 15 31) =    | -0.0528 | n( 4 18 19) =    | 0.0173  |
| n( 1 5 13) =     | -0.0490 | n( 2 15 31 45) = | -0.0203 | n( 4 18 19 33) = | 0.0771  |
| n( 1 5 13 17) =  | -0.0148 | n( 2 15 45) =    | -0.0201 | n( 4 18 19 34) = | 0.0129  |
| n( 1 5 17) =     | 0.1389  | n( 2 16 32) =    | -0.0237 | n( 4 18 19 35) = | -0.0125 |
| n( 1 5 17 18) =  | -0.0104 | n( 3 8241) =     | -0.0182 | n( 4 18 19 36) = | 0.0153  |
| n( 1 5 17 19) =  | -0.0125 | n( 3 13 14) =    | -0.0206 | n( 4 18 19 37) = | -0.0188 |
| n( 1 5 17 20) =  | -0.0121 | n( 3 13 14 15) = | 0.0252  | n( 4 18 20 34) = | 0.0110  |
| n( 1 5 17 36) =  | -0.0111 | n( 3 13 14 27) = | 0.0136  | n( 4 18 20 38) = | -0.0114 |
| n( 1 5 18) =     | -0.0276 | n( 3 13 14 29) = | -0.0193 | n( 4 18 33) =    | 0.1743  |
| n( 1 5 18 34) =  | -0.0139 | n( 3 13 15) =    | -0.0211 | n( 4 18 34) =    | -0.0575 |
| n( 1 5 20) =     | -0.0361 | n( 3 13 15 27) = | 0.0148  | n( 4 18 34 36) = | -0.0169 |
| n( 1 5 20 34) =  | -0.0159 | n( 3 13 15 28) = | 0.0123  | n( 4 18 35) =    | -0.0378 |
| n( 1 5 34) =     | -0.0280 | n( 3 13 15 31) = | -0.0207 | n( 4 18 35 50) = | -0.0190 |
| n( 1 6 7) =      | -0.0230 | n( 3 13 16) =    | 0.2555  | n( 4 18 50) =    | -0.0188 |
| n( 1 6 10) =     | 0.0150  | n( 3 13 16 32) = | -0.0219 | n( 4 19 20 36) = | 0.0150  |
| n( 1 7 12) =     | 0.0137  | n( 3 13 27 28) = | 0.0114  | n( 4 19 33) =    | 0.1476  |
| n( 1 9208) =     | 0.0104  | n( 3 13 27 30) = | 0.0110  | n( 4 19 34 36) = | 0.0158  |
| n( 1 10193) =    | 0.0141  | n( 3 13 28 30) = | 0.0373  | n( 4 19 36) =    | -0.0653 |
| n( 1 11206) =    | 0.0119  | n( 3 14 15 29) = | -0.0107 | n( 4 19 37) =    | -0.0635 |
| n( 1 12231) =    | 0.0135  | n( 3 14 16 28) = | 0.0145  | n( 4 19 37 53) = | -0.0227 |
| n( 1 13 14) =    | -0.0175 | n( 3 14 28) =    | 0.0102  | n( 4 19 53) =    | -0.0227 |
| n( 1 13 16) =    | -0.0142 | n( 3 14 29) =    | -0.0233 | n( 4 20 36) =    | 0.0108  |
| n( 1 13 17) =    | -0.0287 | n( 3 15 16) =    | 0.0232  | n( 4 20 38) =    | -0.0257 |
| n( 1 13 28) =    | -0.0189 | n( 3 15 16 27) = | 0.0126  | n( 4 33 34) =    | -0.0128 |
| n( 1 17 19) =    | -0.0210 | n( 3 15 16 28) = | 0.0156  | n( 4 34 36) =    | 0.0115  |
| n( 1 17 20) =    | -0.0195 | n( 3 15 16 30) = | 0.0820  | n( 5 17 18) =    | -0.0297 |
| n( 1 17 36) =    | -0.0241 | n( 3 15 16 31) = | -0.0152 | n( 5 17 18 19) = | 0.0210  |
| n( 2 3 13) =     | 0.3590  | n( 3 15 16 32) = | -0.0204 | n( 5 17 18 33) = | 0.0167  |
| n( 2 3 13 14) =  | 0.0166  | n( 3 15 27) =    | -0.0596 | n( 5 17 18 35) = | -0.0198 |
| n( 2 3 13 15) =  | 0.0157  | n( 3 15 27 28) = | 0.0163  | n( 5 17 18 36) = | 0.0129  |
| n( 2 3 13 16) =  | 0.0164  | n( 3 15 28) =    | 0.0100  | n( 5 17 19) =    | -0.0349 |
| n( 2 3 14) =     | -0.0394 | n( 3 15 30) =    | 0.1690  | n( 5 17 19 33) = | 0.0150  |
| n( 2 3 14 16) =  | 0.0167  | n( 3 15 31) =    | -0.0433 | n( 5 17 19 37) = | -0.0221 |
| n( 2 3 14 28) =  | 0.0169  | n( 3 15 31 46) = | -0.0156 | n( 5 17 20) =    | 0.2580  |
| n( 2 3 14 29) =  | -0.0217 | n( 3 15 46) =    | -0.0149 | n( 5 17 20 38) = | -0.0228 |
| n( 2 3 14 30) =  | 0.0108  | n( 3 16 27 28) = | 0.0152  | n( 5 17 33) =    | 0.0109  |
| n( 2 3 15) =     | 0.2574  | n( 3 16 28) =    | -0.0662 | n( 5 17 33 34) = | 0.0107  |
| n( 2 3 15 31) =  | -0.0195 | n( 3 16 30) =    | 0.1399  | n( 5 17 33 36) = | 0.0112  |
| n( 2 3 16) =     | -0.0413 | n( 3 16 32) =    | -0.0625 | n( 5 17 34 36) = | 0.0358  |
| n( 2 3 16 28) =  | 0.0161  | n( 3 16 32 47) = | -0.0224 | n( 5 17 36) =    | -0.0179 |
| n( 2 3 16 32) =  | -0.0223 | n( 3 16 47) =    | -0.0227 | n( 5 18 19 33) = | 0.0121  |
| n( 2 3 27 30) =  | 0.0350  | n( 3 16241) =    | -0.0122 | n( 5 18 20) =    | 0.0462  |
| n( 2 3 28) =     | 0.0118  | n( 3 27 28) =    | 0.0110  | n( 5 18 20 33) = | 0.0110  |
| n( 2 3 28 30) =  | 0.0103  | n( 3 27 30) =    | -0.0127 | n( 5 18 20 34) = | 0.0924  |
| n( 2 3 30) =     | -0.0171 | n( 4 5 17) =     | 0.3686  | n( 5 18 20 35) = | -0.0198 |
| n( 2 13 14) =    | 0.2527  | n( 4 5 17 18) =  | 0.0162  | n( 5 18 20 36) = | 0.0117  |
| n( 2 13 14 29) = | -0.0198 | n( 4 5 17 19) =  | 0.0153  | n( 5 18 20 38) = | -0.0204 |
| n( 2 13 15) =    | -0.0290 | n( 4 5 17 20) =  | 0.0182  | n( 5 18 33) =    | -0.0665 |
| n( 2 13 15 16) = | 0.0212  | n( 4 5 18) =     | 0.2635  | n( 5 18 33 36) = | 0.0140  |
| n( 2 13 15 28) = | 0.0130  | n( 4 5 18 35) =  | -0.0191 | n( 5 18 34) =    | 0.1008  |
| n( 2 13 15 30) = | 0.0164  | n( 4 5 19) =     | -0.0400 | n( 5 18 35) =    | -0.0564 |
| n( 2 13 15 31) = | -0.0211 | n( 4 5 19 20) =  | 0.0182  | n( 5 18 35 50) = | -0.0119 |
| n( 2 13 16) =    | -0.0316 | n( 4 5 19 36) =  | 0.0159  | n( 5 18 35 51) = | -0.0142 |
| n( 2 13 16 30) = | 0.0139  | n( 4 5 19 37) =  | -0.0225 | n( 5 18 50) =    | -0.0117 |
| n( 2 13 16 32) = | -0.0211 | n( 4 5 20) =     | -0.0366 | n( 5 18 51) =    | -0.0131 |
| n( 2 13 27 28) = | 0.0342  | n( 4 5 20 33) =  | 0.0111  | n( 5 19 20 36) = | 0.0137  |
| n( 2 13 27 30) = | 0.0102  | n( 4 5 20 36) =  | 0.0180  | n( 5 19 37) =    | -0.0242 |
| n( 2 13 28) =    | -0.0180 | n( 4 5 20 38) =  | -0.0236 | n( 5 20 33 36) = | 0.0138  |
| n( 2 13 28 30) = | 0.0105  | n( 4 5 33) =     | -0.0163 | n( 5 20 34) =    | 0.0976  |
| n( 2 13 30) =    | 0.0102  | n( 4 5 33 34) =  | 0.0354  | n( 5 20 36) =    | -0.0650 |
| n( 2 14 15) =    | 0.0475  | n( 4 5 33 36) =  | 0.0105  | n( 5 20 38) =    | -0.0625 |
| n( 2 14 15 27) = | 0.0926  | n( 4 5 34 36) =  | 0.0103  | n( 5 20 38 56) = | -0.0241 |
| n( 2 14 15 28) = | 0.0113  | n( 4 5 36) =     | 0.0118  | n( 5 20 56) =    | -0.0237 |
| n( 2 14 15 29) = | -0.0196 | n( 4 17 18) =    | -0.0234 | n( 6 9 10) =     | 0.0183  |
| n( 2 14 15 31) = | -0.0184 | n( 4 17 18 20) = | 0.0262  | n( 6 9 10 23) =  | 0.0160  |
| n( 2 14 16 28) = | 0.0130  | n( 4 17 18 34) = | 0.0152  | n( 6 9 10 24) =  | 0.0203  |
| n( 2 14 27) =    | 0.0911  | n( 4 17 18 35) = | -0.0198 | n( 6 9 23) =     | -0.0248 |
| n( 2 14 28) =    | -0.0678 | n( 4 17 18 36) = | 0.0117  | n( 6 10 24) =    | -0.0183 |
| n( 2 14 28 30) = | 0.0131  | n( 4 17 19) =    | 0.2615  | n( 6 10 192) =   | -0.0124 |
| n( 2 14 29) =    | -0.0596 | n( 4 17 19 37) = | -0.0229 | n( 7 11 12) =    | 0.0178  |
| n( 2 14 29 42) = | -0.0228 | n( 4 17 20) =    | -0.0230 | n( 7 11 12 25) = | 0.0211  |

n( 7 11 12 26)= 0.0161  
n( 7 11 25) = -0.0156  
n( 7 11 25 26)= -0.0105  
n( 7 11207) = -0.0122  
n( 7 12 26) = -0.0247  
n( 8 21 31) = -0.0468  
n( 8 21 31 45)= -0.0129  
n( 8 21 31239)= -0.0274  
n( 8 21 39) = -0.0479  
n( 8 21 39121)= -0.0212  
n( 8 21 39240)= -0.0216  
n( 8 21 40) = -0.0483  
n( 8 21 40204)= -0.0250  
n( 8 21 40241)= -0.0282  
n( 8 21 45) = -0.0112  
n( 8 21121) = -0.0165  
n( 8 21204) = -0.0214  
n( 8 21239) = 0.0347  
n( 8 21239240)= 0.0105  
n( 8 21239241)= 0.0122  
n( 8 21240) = 0.0347  
n( 8 21240241)= 0.0127  
n( 8 21241) = 0.0379  
n( 8239240) = 0.0249  
n( 8239240241)= 0.0106  
n( 8239241) = 0.0274  
n( 8240241) = 0.0269  
n( 9 10 23) = 0.0170  
n( 9 10 23 24)= 0.0334  
n( 9 10 24) = 0.0208  
n( 9 23 24) = 0.0445  
n( 9 23 24208)= -0.0108  
n( 9 23 24242)= -0.0135  
n( 9 23152) = 0.0176  
n( 9 23152209)= -0.0119  
n( 9 23153) = 0.0274  
n( 9 23208) = 0.0152  
n( 9 24208) = -0.0105  
n( 9208209) = 0.0211  
n( 10 23 24) = 0.0349  
n( 10 23 24153)= -0.0127  
n( 10 23 24193)= -0.0131  
n( 10 23193) = -0.0146  
n( 10 24192243)= -0.0122  
n( 10 24193) = 0.0104  
n( 10 24242) = 0.0332  
n( 10 24243) = 0.0117  
n( 10192193) = 0.0185  
n( 11 12 25) = 0.0217  
n( 11 12 25 26)= 0.0333  
n( 11 12 26) = 0.0173  
n( 11 25 26) = 0.0341  
n( 11 25 26188)= -0.0151  
n( 11 25 26206)= -0.0124  
n( 11 25144) = 0.0343  
n( 11 25145) = 0.0130  
n( 11 25145207)= -0.0116  
n( 11 25206) = 0.0141  
n( 11 26188) = -0.0103  
n( 11 26206) = -0.0126  
n( 11206207) = 0.0205  
n( 12 25 26) = 0.0460  
n( 12 25 26144)= -0.0142  
n( 12 25 26231)= -0.0100  
n( 12 25144) = -0.0116  
n( 12 25231) = -0.0103  
n( 12 26187) = 0.0134  
n( 12 26187232)= -0.0113  
n( 12 26188) = 0.0280  
n( 12 26231) = 0.0158  
n( 12231232) = 0.0216  
n( 13 14 15 27)= 0.0114  
n( 13 14 15 31)= -0.0114  
n( 13 14 16 27)= 0.0163  
n( 13 14 16 28)= 0.0479  
n( 13 14 16 29)= -0.0128  
n( 13 14 16 30)= 0.0167  
n( 13 14 16 32)= -0.0158  
n( 13 14 27) = -0.0639  
n( 13 14 27 30)= 0.0187  
n( 13 14 28) = 0.2283  
n( 13 14 29) = -0.0440  
n( 13 14 29 43)= -0.0197  
n( 13 14 30) = 0.0107  
n( 13 14 43) = -0.0189  
n( 13 14231) = -0.0114  
n( 13 15 16 30)= 0.0143  
n( 13 15 27 28)= 0.0124  
n( 13 15 28 30)= 0.0118  
n( 13 15 30) = 0.0104  
n( 13 15 31) = -0.0250  
n( 13 16 27 30)= 0.0178  
n( 13 16 28) = 0.2124  
n( 13 16 30) = -0.0630  
n( 13 16 32) = -0.0527  
n( 13 16 32 47)= -0.0100  
n( 13 16 32 48)= -0.0152  
n( 13 16 47) = -0.0102  
n( 13 16 48) = -0.0144  
n( 13 27 28) = -0.0131  
n( 13 27 30) = 0.0132  
n( 14 15 27) = 0.0483  
n( 14 15 27 29)= -0.0182  
n( 14 15 27 31)= -0.0180  
n( 14 15 28) = 0.0126  
n( 14 15 28 30)= 0.0297  
n( 14 15 28 31)= -0.0107  
n( 14 15 29) = -0.0313  
n( 14 15 30) = 0.0111  
n( 14 15 31) = -0.0307  
n( 14 16 27) = 0.0102  
n( 14 16 27 30)= 0.0193  
n( 14 16 28) = -0.0135  
n( 14 16 28 29)= -0.0146  
n( 14 16 28 32)= -0.0172  
n( 14 16 29) = -0.0142  
n( 14 16 30) = 0.0108  
n( 14 16 32) = -0.0183  
n( 14 27 28) = 0.2968  
n( 14 27 28 30)= 0.0185  
n( 14 27 29) = -0.0334  
n( 14 27 29 30)= -0.0168  
n( 14 27 29 44)= -0.0181  
n( 14 27 30) = -0.0317  
n( 14 27 44) = -0.0147  
n( 14 28 29) = -0.0194  
n( 14 28 29 30)= -0.0155  
n( 14 28 29 43)= -0.0105  
n( 14 28 30) = -0.0231  
n( 14 29 30) = -0.0163  
n( 14 29 42 62)= -0.0179  
n( 14 29 43) = 0.0124  
n( 14 29 43 64)= -0.0175  
n( 14 29 44 68)= -0.0199  
n( 14 29 62) = -0.0115  
n( 14 43 64) = -0.0133  
n( 14 44 68) = -0.0136  
n( 15 16 27) = 0.0108  
n( 15 16 27 28)= 0.0250  
n( 15 16 28) = 0.0130  
n( 15 16 30) = 0.0195  
n( 15 16 30 31)= -0.0160  
n( 15 16 30 32)= -0.0195  
n( 15 16 31) = -0.0209  
n( 15 16 32) = -0.0277  
n( 15 21 27) = -0.0187  
n( 15 21 27 31)= -0.0195  
n( 15 21 31) = 0.0134  
n( 15 21 31 40)= -0.0197  
n( 15 21 40) = -0.0157  
n( 15 27 28) = -0.0199  
n( 15 27 28 30)= 0.0229  
n( 15 27 28 31)= -0.0195  
n( 15 27 30) = 0.3119  
n( 15 27 30 31)= -0.0127  
n( 15 27 31) = -0.0384  
n( 15 28 30) = -0.0165  
n( 15 28 30 31)= -0.0192  
n( 15 28 31) = -0.0220  
n( 15 30 31) = -0.0272  
n( 15 30 31 46)= -0.0129  
n( 15 30 46) = -0.0112  
n( 15 31 45) = 0.0127  
n( 15 31 45 71)= -0.0165  
n( 15 31 46 74)= -0.0179  
n( 15 46 74) = -0.0139  
n( 16 27 28) = -0.0294  
n( 16 27 28 30)= 0.0153  
n( 16 27 28 32)= -0.0152  
n( 16 27 30) = -0.0392  
n( 16 27 30 32)= -0.0167  
n( 16 27 32) = -0.0164  
n( 16 28 30) = 0.2989  
n( 16 28 30 32)= -0.0107  
n( 16 28 32) = -0.0285  
n( 16 28 32 48)= -0.0148  
n( 16 28 48) = -0.0133  
n( 16 28146) = -0.0126  
n( 16 30 32) = -0.0344  
n( 16 30 32 49)= -0.0201  
n( 16 30 49) = -0.0171  
n( 16 32 47) = 0.0137  
n( 16 32 47 77)= -0.0167  
n( 16 32 48) = 0.0101  
n( 16 32 48 79)= -0.0182  
n( 16 32 49 81)= -0.0189  
n( 16 32 77) = -0.0101  
n( 16 47 77) = -0.0104  
n( 16 48 79) = -0.0140  
n( 16 49 81) = -0.0132  
n( 17 18 19 33)= 0.0137  
n( 17 18 20 34)= 0.0119  
n( 17 18 20 35)= -0.0110  
n( 17 18 33) = 0.0103  
n( 17 18 33 36)= 0.0110  
n( 17 18 34 36)= 0.0118  
n( 17 18 35) = -0.0230  
n( 17 19 20 33)= 0.0175  
n( 17 19 20 34)= 0.0158  
n( 17 19 20 36)= 0.0560  
n( 17 19 20 37)= -0.0162  
n( 17 19 20 38)= -0.0144  
n( 17 19 33) = -0.0653  
n( 17 19 33 34)= 0.0176  
n( 17 19 36) = 0.2029  
n( 17 19 37) = -0.0539  
n( 17 19 37 54)= -0.0163  
n( 17 19 54) = -0.0151  
n( 17 20 33) = 0.0109  
n( 17 20 33 34)= 0.0186  
n( 17 20 34) = -0.0598  
n( 17 20 36) = 0.2136  
n( 17 20 38) = -0.0505  
n( 17 20 38 55)= -0.0176  
n( 17 20 55) = -0.0172  
n( 17 33 34) = 0.0129  
n( 17 34 36) = -0.0127  
n( 18 19 33) = 0.0142  
n( 18 19 33 35)= -0.0130  
n( 18 19 33 37)= -0.0183  
n( 18 19 34) = 0.0104  
n( 18 19 34 36)= 0.0247  
n( 18 19 35) = -0.0160  
n( 18 19 36) = 0.0128  
n( 18 19 37) = -0.0252  
n( 18 20 33) = 0.0119  
n( 18 20 33 36)= 0.0296  
n( 18 20 34) = 0.0437

n( 18 20 34 35) = -0.0201  
n( 18 20 34 38) = -0.0188  
n( 18 20 35) = -0.0323  
n( 18 20 35 36) = -0.0102  
n( 18 20 36) = 0.0127  
n( 18 20 38) = -0.0313  
n( 18 33 34) = 0.3145  
n( 18 33 34 35) = -0.0109  
n( 18 33 34 36) = 0.0216  
n( 18 33 35) = -0.0201  
n( 18 33 35 36) = -0.0175  
n( 18 33 35 41) = -0.0188  
n( 18 33 36) = -0.0193  
n( 18 33 41) = -0.0162  
n( 18 34 35) = -0.0382  
n( 18 34 35 36) = -0.0185  
n( 18 34 35 51) = -0.0116  
n( 18 34 36) = -0.0230  
n( 18 35 36) = -0.0193  
n( 18 35 41) = 0.0101  
n( 18 35 41 59) = -0.0203  
n( 18 35 50) = 0.0164  
n( 18 35 50 86) = -0.0171  
n( 18 35 51 88) = -0.0197  
n( 18 35 88) = -0.0102  
n( 18 41 59) = -0.0152  
n( 18 50 86) = -0.0109  
n( 18 51 88) = -0.0140  
n( 19 20 33) = 0.0118  
n( 19 20 33 34) = 0.0206  
n( 19 20 34) = 0.0102  
n( 19 20 36 37) = -0.0176  
n( 19 20 36 38) = -0.0161  
n( 19 20 37) = -0.0189  
n( 19 20 38) = -0.0165  
n( 19 33 34) = -0.0387  
n( 19 33 34 36) = 0.0144  
n( 19 33 34 37) = -0.0158  
n( 19 33 36) = 0.3032  
n( 19 33 37) = -0.0322  
n( 19 33 37 52) = -0.0198  
n( 19 33 52) = -0.0167  
n( 19 34 36) = -0.0355  
n( 19 34 36 37) = -0.0159  
n( 19 34 37) = -0.0154  
n( 19 36 37) = -0.0252  
n( 19 36 37 54) = -0.0135  
n( 19 36 54) = -0.0115  
n( 19 36154) = -0.0124  
n( 19 37 52 92) = -0.0198  
n( 19 37 53) = 0.0109  
n( 19 37 53 93) = -0.0174  
n( 19 37 54 97) = -0.0184  
n( 19 37 93) = -0.0111  
n( 19 52 92) = -0.0143  
n( 19 54 97) = -0.0132  
n( 20 33 34) = -0.0325  
n( 20 33 34 36) = 0.0187  
n( 20 33 34 38) = -0.0174  
n( 20 33 36) = -0.0234  
n( 20 33 36 38) = -0.0157  
n( 20 33 38) = -0.0171  
n( 20 34 36) = 0.3046  
n( 20 34 38) = -0.0296  
n( 20 34 38 57) = -0.0173  
n( 20 34 57) = -0.0136  
n( 20 36 38) = -0.0189  
n( 20 36 38 55) = -0.0124  
n( 20 36 55) = -0.0109  
n( 20 36125) = -0.0103  
n( 20 38 55) = 0.0115  
n( 20 38 55 99) = -0.0176  
n( 20 38 56) = 0.0124  
n( 20 38 56104) = -0.0174  
n( 20 38 57105) = -0.0188  
n( 20 38104) = -0.0111  
n( 20 55 99) = -0.0131  
n( 20 57105) = -0.0123  
n( 21 31 39) = -0.0443  
n( 21 31 39 46) = -0.0152  
n( 21 31 39122) = -0.0253  
n( 21 31 40) = -0.0386  
n( 21 31 40205) = -0.0258  
n( 21 31 45 70) = -0.0135  
n( 21 31 46 72) = -0.0154  
n( 21 31122) = -0.0199  
n( 21 31205) = -0.0194  
n( 21 31239) = -0.0201  
n( 21 39 40) = -0.0464  
n( 21 39 40120) = -0.0231  
n( 21 39 40203) = -0.0235  
n( 21 39 46) = -0.0131  
n( 21 39120) = 0.0364  
n( 21 39120121) = 0.0104  
n( 21 39121) = 0.0352  
n( 21 39122) = 0.0356  
n( 21 39203) = -0.0192  
n( 21 39240) = -0.0159  
n( 21 40120) = -0.0185  
n( 21 40203) = 0.0350  
n( 21 40203204) = 0.0104  
n( 21 40204) = 0.0381  
n( 21 40205) = 0.0336  
n( 21 40241) = -0.0228  
n( 21 45 70) = -0.0116  
n( 21 46 72) = -0.0132  
n( 21239241) = 0.0108  
n( 21240241) = 0.0114  
n( 22 35 41) = -0.0430  
n( 22 35 41 50) = -0.0128  
n( 22 35 41140) = -0.0262  
n( 22 41 50) = -0.0103  
n( 22 41 58) = -0.0489  
n( 22 41 58138) = -0.0230  
n( 22 41 58189) = -0.0230  
n( 22 41 59) = -0.0471  
n( 22 41 59139) = -0.0263  
n( 22 41 59228) = -0.0236  
n( 22 41138) = 0.0375  
n( 22 41138139) = 0.0126  
n( 22 41138140) = 0.0107  
n( 22 41139) = 0.0397  
n( 22 41139140) = 0.0117  
n( 22 41140) = 0.0353  
n( 22 41189) = -0.0190  
n( 22 41228) = -0.0198  
n( 22138139) = 0.0265  
n( 22138139140) = 0.0104  
n( 22138140) = 0.0252  
n( 22139140) = 0.0268  
n( 23 24152) = 0.0107  
n( 23 24152243) = -0.0105  
n( 23 24153) = 0.0222  
n( 23 24242) = 0.0200  
n( 23152153) = 0.0233  
n( 24242243) = 0.0243  
n( 25 26144) = 0.0222  
n( 25 26145187) = -0.0106  
n( 25 26188) = 0.0213  
n( 25144145) = 0.0248  
n( 26187188) = 0.0235  
n( 27 28 30) = 0.3654  
n( 28 30198) = -0.0114  
n( 29 42 43 61) = -0.0137  
n( 29 42 43 65) = -0.0133  
n( 29 42 44 60) = -0.0157  
n( 29 42 44 67) = -0.0141  
n( 29 42 60) = -0.0443  
n( 29 42 60148) = -0.0249  
n( 29 42 61) = -0.0407  
n( 29 42 61202) = -0.0243  
n( 29 42 62) = -0.0272  
n( 29 42 62115) = -0.0231  
n( 29 42115) = -0.0176  
n( 29 42148) = -0.0207  
n( 29 42202) = -0.0186  
n( 29 43 44 63) = -0.0140  
n( 29 43 44 66) = -0.0153  
n( 29 43 63) = -0.0385  
n( 29 43 63168) = -0.0240  
n( 29 43 64) = -0.0308  
n( 29 43 64141) = -0.0218  
n( 29 43 65) = -0.0421  
n( 29 43 65262) = -0.0251  
n( 29 43141) = -0.0152  
n( 29 43168) = -0.0181  
n( 29 43262) = -0.0193  
n( 29 44 66) = -0.0413  
n( 29 44 66129) = -0.0248  
n( 29 44 67) = -0.0435  
n( 29 44 67220) = -0.0235  
n( 29 44 68) = -0.0325  
n( 29 44 68274) = -0.0221  
n( 29 44129) = -0.0193  
n( 29 44220) = -0.0175  
n( 29 44274) = -0.0164  
n( 31 45 46 69) = -0.0149  
n( 31 45 46 73) = -0.0131  
n( 31 45 69) = -0.0447  
n( 31 45 69197) = -0.0249  
n( 31 45 70) = -0.0422  
n( 31 45 70112) = -0.0250  
n( 31 45 71) = -0.0272  
n( 31 45 71117) = -0.0232  
n( 31 45112) = -0.0195  
n( 31 45117) = -0.0174  
n( 31 45197) = -0.0200  
n( 31 46 72) = -0.0416  
n( 31 46 72285) = -0.0262  
n( 31 46 73) = -0.0407  
n( 31 46 73108) = -0.0264  
n( 31 46 74) = -0.0314  
n( 31 46 74126) = -0.0214  
n( 31 46108) = -0.0186  
n( 31 46126) = -0.0148  
n( 31 46285) = -0.0214  
n( 32 47 48 75) = -0.0138  
n( 32 47 48 80) = -0.0141  
n( 32 47 49 76) = -0.0149  
n( 32 47 49 82) = -0.0140  
n( 32 47 75) = -0.0401  
n( 32 47 75280) = -0.0243  
n( 32 47 76) = -0.0435  
n( 32 47 76268) = -0.0258  
n( 32 47 77) = -0.0269  
n( 32 47 77151) = -0.0235  
n( 32 47151) = -0.0173  
n( 32 47268) = -0.0208  
n( 32 47280) = -0.0187  
n( 32 48 49 78) = -0.0136  
n( 32 48 49 83) = -0.0147  
n( 32 48 78) = -0.0411  
n( 32 48 78223) = -0.0246  
n( 32 48 79) = -0.0329  
n( 32 48 79218) = -0.0228  
n( 32 48 80) = -0.0423  
n( 32 48 80212) = -0.0248  
n( 32 48212) = -0.0192  
n( 32 48218) = -0.0168  
n( 32 48223) = -0.0191  
n( 32 49 81) = -0.0346  
n( 32 49 81195) = -0.0229  
n( 32 49 82) = -0.0395  
n( 32 49 82271) = -0.0239  
n( 32 49 83) = -0.0448  
n( 32 49 83279) = -0.0245  
n( 32 49195) = -0.0171  
n( 32 49271) = -0.0168

|                           |                           |                           |
|---------------------------|---------------------------|---------------------------|
| n( 32 49279) = -0.0188    | n( 35 50250) = -0.0208    | n( 37 52226) = -0.0170    |
| n( 33 34 36) = 0.3663     | n( 35 50256) = -0.0190    | n( 37 52255) = -0.0174    |
| n( 34 36252) = -0.0102    | n( 35 51 87) = -0.0434    | n( 37 53 54 94) = -0.0138 |
| n( 35 41 50 84) = -0.0149 | n( 35 51 87235) = -0.0269 | n( 37 53 54 98) = -0.0132 |
| n( 35 41 51 58) = -0.0138 | n( 35 51 88) = -0.0332    | n( 37 53 93) = -0.0267    |
| n( 35 41 51 87) = -0.0156 | n( 35 51 88164) = -0.0246 | n( 37 53 93185) = -0.0240 |
| n( 35 41 58) = -0.0384    | n( 35 51 89) = -0.0434    | n( 37 53 94) = -0.0389    |
| n( 35 41 58191) = -0.0244 | n( 35 51 89160) = -0.0268 | n( 37 53 94246) = -0.0240 |
| n( 35 41 59) = -0.0331    | n( 35 51160) = -0.0207    | n( 37 53 95) = -0.0447    |
| n( 35 41 59230) = -0.0236 | n( 35 51164) = -0.0191    | n( 37 53 95123) = -0.0254 |
| n( 35 41140) = -0.0186    | n( 35 51235) = -0.0222    | n( 37 53123) = -0.0211    |
| n( 35 41191) = -0.0175    | n( 37 52 53 90) = -0.0139 | n( 37 53185) = -0.0180    |
| n( 35 41230) = -0.0174    | n( 37 52 53 95) = -0.0148 | n( 37 53246) = -0.0181    |
| n( 35 50 51 85) = -0.0138 | n( 37 52 54 91) = -0.0156 | n( 37 54 96) = -0.0389    |
| n( 35 50 51 89) = -0.0138 | n( 37 52 54 96) = -0.0137 | n( 37 54 96171) = -0.0236 |
| n( 35 50 84) = -0.0422    | n( 37 52 90) = -0.0394    | n( 37 54 97) = -0.0320    |
| n( 35 50 84214) = -0.0251 | n( 37 52 90226) = -0.0244 | n( 37 54 97177) = -0.0223 |
| n( 35 50 85) = -0.0446    | n( 37 52 91) = -0.0443    | n( 37 54 98) = -0.0418    |
| n( 35 50 85250) = -0.0251 | n( 37 52 91181) = -0.0255 | n( 37 54 98267) = -0.0250 |
| n( 35 50 86) = -0.0297    | n( 37 52 92) = -0.0351    | n( 37 54171) = -0.0180    |
| n( 35 50 86256) = -0.0250 | n( 37 52 92255) = -0.0231 | n( 37 54177) = -0.0161    |
| n( 35 50214) = -0.0196    | n( 37 52181) = -0.0202    | n( 37 54267) = -0.0193    |

### Calculated partial atomic charges

```

*****
*
*      atomic charges with multicenter corrections      *
*
*****

```

| atom   charge   | atom   charge   | atom   charge  |
|-----------------|-----------------|----------------|
| 1 sm   0.7357   | 26 c   -0.0857  | 51 si   0.2200 |
| 2 ge   -0.1587  | 27 ge   -0.1045 | 52 si   0.2202 |
| 3 ge   -0.1391  | 28 ge   -0.0236 | 53 si   0.2477 |
| 4 ge   -0.1381  | 29 si   -0.0070 | 54 si   0.2325 |
| 5 ge   -0.1373  | 30 ge   -0.0672 | 55 si   0.2429 |
| 6 o   -0.2076   | 31 si   0.0322  | 56 si   0.2516 |
| 7 o   -0.2147   | 32 si   0.0134  | 57 si   0.2214 |
| 8 c   -0.2596   | 33 ge   -0.0514 | 58 c   -0.2939 |
| 9 c   0.0279    | 34 ge   -0.1113 | 59 c   -0.2951 |
| 10 c   0.0203   | 35 si   0.0018  | 60 c   -0.2848 |
| 11 c   0.0357   | 36 ge   -0.0430 | 61 c   -0.2992 |
| 12 c   0.0281   | 37 si   -0.0056 | 62 c   -0.2926 |
| 13 ge   -0.1592 | 38 si   0.0037  | 63 c   -0.2886 |
| 14 ge   0.1184  | 39 c   -0.2958  | 64 c   -0.2903 |
| 15 ge   0.1481  | 40 c   -0.2936  | 65 c   -0.2670 |
| 16 ge   0.0847  | 41 si   0.2244  | 66 c   -0.2736 |
| 17 ge   -0.1707 | 42 si   0.2526  | 67 c   -0.2774 |
| 18 ge   0.1542  | 43 si   0.2324  | 68 c   -0.2847 |
| 19 ge   0.1033  | 44 si   0.2183  | 69 c   -0.2831 |
| 20 ge   0.1436  | 45 si   0.2501  | 70 c   -0.2945 |
| 21 si   0.1973  | 46 si   0.2255  | 71 c   -0.2938 |
| 22 c   -0.2664  | 47 si   0.2449  | 72 c   -0.2718 |
| 23 c   -0.0745  | 48 si   0.2221  | 73 c   -0.2848 |
| 24 c   -0.0863  | 49 si   0.2172  | 74 c   -0.2921 |
| 25 c   -0.0838  | 50 si   0.2400  | 75 c   -0.2912 |

|                 |                |                |
|-----------------|----------------|----------------|
| 76 c   -0.2809  | 127 h   0.0621 | 178 h   0.0797 |
| 77 c   -0.2907  | 128 h   0.0675 | 179 h   0.0659 |
| 78 c   -0.2865  | 129 h   0.0598 | 180 h   0.0660 |
| 79 c   -0.2916  | 130 h   0.0661 | 181 h   0.0686 |
| 80 c   -0.2754  | 131 h   0.0582 | 182 h   0.0683 |
| 81 c   -0.2962  | 132 h   0.0627 | 183 h   0.0595 |
| 82 c   -0.2925  | 133 h   0.0660 | 184 h   0.0667 |
| 83 c   -0.2821  | 134 h   0.0716 | 185 h   0.0691 |
| 84 c   -0.2939  | 135 h   0.0604 | 186 h   0.0624 |
| 85 c   -0.2906  | 136 h   0.0593 | 187 h   0.0758 |
| 86 c   -0.3006  | 137 h   0.0734 | 188 h   0.0643 |
| 87 c   -0.2809  | 138 h   0.0643 | 189 h   0.0626 |
| 88 c   -0.2928  | 139 h   0.0535 | 190 h   0.0777 |
| 89 c   -0.2868  | 140 h   0.0711 | 191 h   0.0669 |
| 90 c   -0.2955  | 141 h   0.0674 | 192 h   0.0684 |
| 91 c   -0.2784  | 142 h   0.0631 | 193 h   0.0618 |
| 92 c   -0.2907  | 143 h   0.0636 | 194 h   0.0676 |
| 93 c   -0.2948  | 144 h   0.0669 | 195 h   0.0682 |
| 94 c   -0.2938  | 145 h   0.0671 | 196 h   0.0684 |
| 95 c   -0.2832  | 146 h   0.0735 | 197 h   0.0649 |
| 96 c   -0.2858  | 147 h   0.0643 | 198 h   0.0710 |
| 97 c   -0.2979  | 148 h   0.0644 | 199 h   0.0602 |
| 98 c   -0.2831  | 149 h   0.0623 | 200 h   0.0629 |
| 99 c   -0.3009  | 150 h   0.0662 | 201 h   0.0751 |
| 100 c   -0.2678 | 151 h   0.0668 | 202 h   0.0682 |
| 101 c   -0.2863 | 152 h   0.0702 | 203 h   0.0685 |
| 102 c   -0.3034 | 153 h   0.0607 | 204 h   0.0658 |
| 103 c   -0.2879 | 154 h   0.0723 | 205 h   0.0695 |
| 104 c   -0.2940 | 155 h   0.0676 | 206 h   0.0571 |
| 105 c   -0.2871 | 156 h   0.0674 | 207 h   0.0668 |
| 106 c   -0.2823 | 157 h   0.0649 | 208 h   0.0541 |
| 107 c   -0.2832 | 158 h   0.0592 | 209 h   0.0504 |
| 108 h   0.0689  | 159 h   0.0639 | 210 h   0.0709 |
| 109 h   0.0718  | 160 h   0.0645 | 211 h   0.0550 |
| 110 h   0.0648  | 161 h   0.0677 | 212 h   0.0697 |
| 111 h   0.0602  | 162 h   0.0707 | 213 h   0.0609 |
| 112 h   0.0690  | 163 h   0.0672 | 214 h   0.0702 |
| 113 h   0.0770  | 164 h   0.0659 | 215 h   0.0747 |
| 114 h   0.0635  | 165 h   0.0642 | 216 h   0.0596 |
| 115 h   0.0652  | 166 h   0.0728 | 217 h   0.0725 |
| 116 h   0.0664  | 167 h   0.0595 | 218 h   0.0658 |
| 117 h   0.0628  | 168 h   0.0683 | 219 h   0.0669 |
| 118 h   0.0651  | 169 h   0.0628 | 220 h   0.0726 |
| 119 h   0.0619  | 170 h   0.0718 | 221 h   0.0632 |
| 120 h   0.0724  | 171 h   0.0685 | 222 h   0.0757 |
| 121 h   0.0631  | 172 h   0.0737 | 223 h   0.0690 |
| 122 h   0.0704  | 173 h   0.0640 | 224 h   0.0635 |
| 123 h   0.0691  | 174 h   0.0615 | 225 h   0.0629 |
| 124 h   0.0634  | 175 h   0.0633 | 226 h   0.0710 |
| 125 h   0.0752  | 176 h   0.0707 | 227 h   0.0652 |
| 126 h   0.0668  | 177 h   0.0702 | 228 h   0.0661 |

|                |                |                |
|----------------|----------------|----------------|
| 229 h   0.0636 | 248 h   0.0630 | 267 h   0.0684 |
| 230 h   0.0702 | 249 h   0.0667 | 268 h   0.0652 |
| 231 h   0.0530 | 250 h   0.0637 | 269 h   0.0632 |
| 232 h   0.0457 | 251 h   0.0675 | 270 h   0.0756 |
| 233 h   0.0699 | 252 h   0.0766 | 271 h   0.0673 |
| 234 h   0.0618 | 253 h   0.0641 | 272 h   0.0673 |
| 235 h   0.0660 | 254 h   0.0680 | 273 h   0.0596 |
| 236 h   0.0625 | 255 h   0.0698 | 274 h   0.0643 |
| 237 h   0.0650 | 256 h   0.0711 | 275 h   0.0670 |
| 238 h   0.0693 | 257 h   0.0667 | 276 h   0.0605 |
| 239 h   0.0625 | 258 h   0.0658 | 277 h   0.0776 |
| 240 h   0.0774 | 259 h   0.0695 | 278 h   0.0611 |
| 241 h   0.0336 | 260 h   0.0605 | 279 h   0.0684 |
| 242 h   0.0672 | 261 h   0.0671 | 280 h   0.0688 |
| 243 h   0.0696 | 262 h   0.0661 | 281 h   0.0761 |
| 244 h   0.0581 | 263 h   0.0650 | 282 h   0.0594 |
| 245 h   0.0806 | 264 h   0.0640 | 283 h   0.0641 |
| 246 h   0.0677 | 265 h   0.0772 | 284 h   0.0625 |
| 247 h   0.0658 | 266 h   0.0528 | 285 h   0.0680 |

## 2. [Sm(Ge<sub>9</sub>Hyp<sub>3</sub>)<sub>2</sub>]

**Figure S13.** Geometry optimized structure

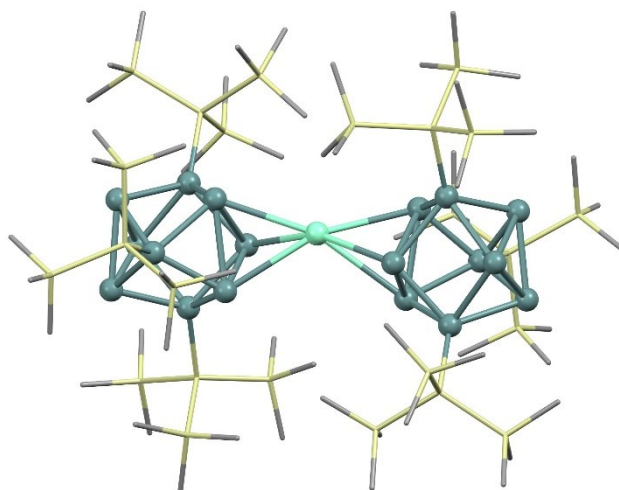

Point group:

C1

Energy:

-47662.87950875043 Hartree

HOMO-LUMO-gap:

0.657eV

Atomic coordinates:

Ge 1.330407 -0.853753 6.307455

Ge 0.309969 1.591037 5.987111

Ge -1.304834 -0.656208 5.997963  
 Ge 2.227118 0.663673 4.406677  
 Ge 0.159251 -2.177603 4.402737  
 Ge -1.624646 1.281328 4.319929  
 Ge 1.433373 -0.915144 2.511338  
 Ge 0.448875 1.619836 2.846814  
 Si 4.411205 1.739839 4.547103  
 Ge -1.261938 -0.760556 2.826334  
 Si -0.463385 -4.535885 4.550030  
 Si -3.543178 2.762405 4.201465  
 Sm -0.409452 0.415558 0.054804  
 Ge -0.405404 -1.513389 -2.563823  
 Ge 1.297554 0.594868 -2.634781  
 Ge -1.478280 1.027463 -2.932286  
 Ge 1.528268 -1.374703 -4.264974  
 Ge -2.087160 -0.968448 -4.436408  
 Ge 0.310739 2.164214 -4.389212  
 Ge -0.245449 -1.522805 -6.172934  
 Ge 1.378646 0.531608 -6.073034  
 Si 3.418345 -2.911529 -4.302675  
 Ge -1.323522 0.969946 -6.017261  
 Si -4.444092 -1.575776 -4.594582  
 Si 0.661376 4.567938 -4.426515  
 Si -4.703006 -2.721161 -6.679306  
 Si -4.888058 -3.031036 -2.753251  
 Si 0.237075 -5.561202 2.511863  
 Si 0.745675 -5.429826 6.410374  
 Si -2.816994 -4.788252 4.883591  
 C -4.554160 -1.505266 -8.129863  
 C -3.394793 -4.076870 -6.891327  
 C -6.421861 -3.535983 -6.746066  
 C -4.030722 -4.707428 -2.993786  
 C -6.759967 -3.327424 -2.583329  
 C -4.257072 -2.266423 -1.133847  
 Si -5.816306 0.377827 -4.502685  
 C -5.254510 1.690394 -5.749290  
 C -7.623785 -0.073274 -4.892689  
 C -5.754545 1.143417 -2.763863  
 C -0.902100 -5.023234 1.091620  
 C 2.019887 -5.075412 2.085360  
 C 0.159327 -7.456158 2.664856  
 C -3.312013 -6.599626 4.568583  
 C -3.304241 -4.339833 6.663285  
 C -3.808627 -3.692422 3.693884  
 C 0.161580 -7.211243 6.742738  
 C 2.609494 -5.463718 6.047761  
 C 0.459772 -4.415670 7.988042  
 H -4.430351 -5.247592 -3.862699  
 H -4.185690 -5.338982 -2.106249  
 H -2.948548 -4.587236 -3.137451  
 H -3.166689 -2.127948 -1.171638  
 H -4.718741 -1.289765 -0.936310  
 H -4.485002 -2.928839 -0.285666  
 H -7.298071 -2.397813 -2.352691  
 H -7.194198 -3.748647 -3.499770  
 H -6.952967 -4.035882 -1.763349  
 H -3.447739 -4.826995 -6.091230  
 H -3.547967 -4.594335 -7.850782  
 H -2.379218 -3.657220 -6.891990  
 H -6.558818 -4.031222 -7.719467  
 H -7.232250 -2.804993 -6.624290  
 H -6.538771 -4.300023 -5.965378  
 H -5.360130 -0.758779 -8.121306  
 H -4.613523 -2.051129 -9.083711  
 H -3.596034 -0.968217 -8.108611  
 H -6.163450 0.462097 -2.005380  
 H -4.719832 1.387094 -2.484015  
 H -6.344784 2.071896 -2.739171  
 H -8.259939 0.818975 -4.788817  
 H -8.015148 -0.845707 -4.217405  
 H -7.733273 -0.439637 -5.922671  
 H -5.898606 2.579776 -5.673308  
 H -4.217849 2.002790 -5.563085  
 H -5.307185 1.321300 -6.781919  
 H 2.120298 -3.987607 1.966220  
 H 2.318780 -5.550946 1.139045  
 H 2.726582 -5.393052 2.863237  
 H -0.550393 -5.449082 0.140211  
 H -0.919209 -3.929574 0.984275  
 H -1.935126 -5.361260 1.251460  
 H 0.427979 -7.916965 1.702039  
 H 0.865098 -7.827455 3.420061  
 H -0.843545 -7.809805 2.938313  
 H -3.575192 -2.629356 3.846845  
 H -3.593184 -3.932860 2.644248  
 H -4.887202 -3.833558 3.863067  
 H -2.750581 -7.297004 5.204664  
 H -4.382780 -6.737975 4.782729  
 H -3.141651 -6.886434 3.521961  
 H -4.395957 -4.412381 6.782624  
 H -3.003201 -3.313451 6.914412  
 H -2.842530 -5.017981 7.393716  
 H -0.602311 -4.370569 8.262065  
 H 0.821063 -3.383611 7.874471  
 H 1.007147 -4.873430 8.826347  
 H 2.989452 -4.461708 5.807295  
 H 3.156346 -5.828755 6.930469  
 H 2.849296 -6.128623 5.207048  
 H -0.896673 -7.239305 7.036408  
 H 0.284558 -7.859145 5.864721  
 H 0.747005 -7.646817 7.566854  
 Si 4.531167 -2.680620 -6.408482  
 Si -0.330786 5.456440 -6.410338  
 Si 4.873904 -2.374817 -2.489148  
 Si -0.327413 5.471870 -2.452460  
 Si 4.766045 3.044769 2.581519  
 Si -4.491566 2.460754 2.026259  
 Si 4.520854 3.071752 6.530068  
 Si -5.054498 2.105883 5.933003  
 Si 5.953679 -0.086466 4.652970  
 Si -2.734504 4.995466 4.476518  
 C 3.412456 -3.261906 -7.828175  
 C 0.588967 4.825027 -7.945692  
 C 5.057358 -0.890497 -6.747485  
 C -2.156854 4.967498 -6.551554  
 C 6.102162 -3.755841 -6.397828  
 C -0.219926 7.355648 -6.364226  
 C 5.783712 -0.740798 -2.818950  
 C -2.209192 5.639641 -2.641469  
 C 6.166975 -3.752856 -2.264339  
 C 0.395527 7.189178 -2.071715  
 C 3.897059 -2.203462 -0.874242  
 C 0.008039 4.329982 -0.967401  
 Si 2.490413 -5.101904 -4.071441  
 Si 3.034181 4.865319 -4.394431  
 C 1.025030 -5.344309 -5.250961  
 C 3.874658 3.828847 -5.740684  
 C 3.795325 -6.433183 -4.456362  
 C 3.473026 6.693758 -4.684775  
 C 1.874922 -5.372490 -2.295140  
 C 3.723242 4.337117 -2.705114  
 C 4.276869 2.069404 1.030403  
 C -3.121855 1.956938 0.785605  
 C 3.735225 4.638561 2.638428  
 C -5.783445 1.072452 1.994274  
 C 6.603720 3.517088 2.438002



C -5.309880 4.056456 1.401322  
C 7.693486 0.532868 5.112522  
C -4.194431 6.211690 4.568500  
C 5.414100 -1.361055 5.950401  
C -1.716476 5.163069 6.065772  
C 6.053387 -0.957412 2.967324  
C -1.639184 5.466214 2.998011  
C 6.188029 3.989929 6.573971  
C -6.674977 3.088801 5.767176  
C 3.141813 4.372748 6.591069  
C -5.445202 0.254593 5.822700  
C 4.391722 1.978037 8.076386  
C -4.290604 2.466362 7.631591  
H 6.461117 -0.819468 -3.679737  
H -2.474870 6.358032 -3.428421  
H 6.387300 -0.463329 -1.941369  
H -2.653252 5.996139 -1.699754  
H 5.077873 0.077183 -3.015674  
H -2.672720 4.675751 -2.825555  
H 3.167065 -1.384152 -0.940782  
H -0.491214 3.364398 -1.150117  
H 3.350099 -3.121772 -0.623574  
H 1.079525 4.141354 -0.820788  
H 4.580238 -1.979065 -0.041537  
H -0.396753 4.763440 -0.041355  
H 5.694826 -4.709358 -2.001516  
H 1.470904 7.138254 -1.854334  
H 6.763841 -3.911124 -3.172373  
H 0.253970 7.884017 -2.910739  
H 6.857168 -3.487420 -1.449255  
H -0.103728 7.620294 -1.190992  
H 5.736410 -0.509196 -5.973366  
H -2.748230 5.338608 -5.704089  
H 5.581073 -0.835434 -7.714100  
H -2.583703 5.390617 -7.473578  
H 4.188750 -0.218794 -6.794268  
H -2.275260 3.875631 -6.594439  
H 6.590741 -3.706085 -7.382986  
H -0.642989 7.776869 -7.288941  
H 5.882927 -4.809917 -6.183707  
H 0.817508 7.706239 -6.280990  
H 6.825821 -3.403865 -5.650028  
H -0.784721 7.774025 -5.519783  
H 3.165676 -4.328976 -7.742849  
H 1.632611 5.166612 -7.965671  
H 3.922647 -3.112126 -8.791986  
H 0.097304 5.195781 -8.857997  
H 2.469003 -2.699264 -7.854318  
H 0.592531 3.727216 -7.987584  
H 2.701721 -5.346029 -1.571938  
H 3.344827 4.974507 -1.894244  
H 1.144952 -4.604782 -2.004148  
H 3.454007 3.297033 -2.474454  
H 1.386776 -6.355581 -2.213017  
H 4.821297 4.411845 -2.705562  
H 3.368372 -7.432346 -4.279857  
H 4.562202 6.832196 -4.607899  
H 4.688098 -6.333494 -3.824670  
H 2.997634 7.355809 -3.948961  
H 4.118397 -6.391449 -5.505381  
H 3.165837 7.026039 -5.685489

H 0.598777 -6.350814 -5.120353  
H 4.966026 3.961283 -5.686617  
H 0.231707 -4.610100 -5.054359  
H 3.655530 2.758853 -5.621183  
H 1.322483 -5.236995 -6.302563  
H 3.548321 4.123390 -6.746783  
H 2.667768 4.415109 2.769335  
H -5.357475 0.115064 2.323113  
H 3.853226 5.196438 1.697441  
H -6.165730 0.940285 0.971094  
H 4.047863 5.296745 3.460133  
H -6.638959 1.303414 2.643031  
H 4.441168 2.680982 0.130391  
H -3.493998 1.975108 -0.248194  
H 3.214785 1.787545 1.059539  
H -2.844912 0.921378 1.057443  
H 4.861572 1.146364 0.925309  
H -2.247634 2.621177 0.874404  
H 6.758782 4.153352 1.553431  
H -5.741564 3.889523 0.403179  
H 6.955512 4.073471 3.317168  
H -6.121993 4.374984 2.069087  
H 7.240672 2.629225 2.325372  
H -4.593743 4.885119 1.323682  
H 5.061434 -1.290648 2.632312  
H -0.803143 4.761565 2.885869  
H 6.469343 -0.298052 2.193298  
H -2.206861 5.473520 2.057401  
H 6.702351 -1.843533 3.037731  
H -1.217237 6.472227 3.142893  
H 7.717121 0.955611 6.126161  
H -4.826873 6.017204 5.445235  
H 8.405098 -0.306500 5.085618  
H -3.814548 7.241104 4.654527  
H 8.055966 1.302538 4.417988  
H -4.830568 6.163402 3.674920  
H 6.126971 -2.199458 5.972118  
H -1.316148 6.185115 6.143623  
H 4.419235 -1.766703 5.720599  
H -0.868914 4.463809 6.079167  
H 5.369935 -0.927447 6.957966  
H -2.323415 4.969569 6.960195  
H 5.231871 1.274331 8.150488  
H -4.130929 3.541468 7.789923  
H 3.461183 1.393776 8.079955  
H -3.323375 1.959185 7.751689  
H 4.399277 2.605022 8.980957  
H -4.960398 2.106264 8.427141  
H 2.147233 3.904848 6.587642  
H -4.530967 -0.347652 5.917047  
H 3.233890 4.966083 7.513616  
H -6.124598 -0.031395 6.639975  
H 3.193287 5.062351 5.738193  
H -5.928938 -0.008632 4.873082  
H 7.042662 3.301762 6.535322  
H -6.506092 4.171235 5.842001  
H 6.285707 4.693470 5.735653  
H -7.177594 2.892805 4.810047  
H 6.265204 4.570444 7.505997  
H -7.368639 2.800552 6.571585

### 3. [(thf)<sub>2</sub>Eu(Ge<sub>9</sub>Hyp<sub>3</sub>)<sub>2</sub>]

Figure S14. Geometry optimized structure

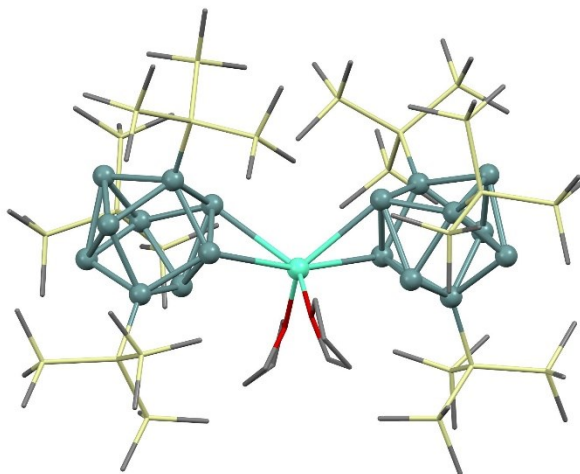

Point group: C1  
Energy: -47662.87950875043 Hartree  
HOMO-LUMO-gap: 0.657eV

**Atomic coordinates:**

|                                  |                                  |
|----------------------------------|----------------------------------|
| Eu 12.408075 13.530689 8.753290  | Ge 17.413217 17.824313 7.416467  |
| Ge 15.284589 14.039830 6.985182  | Si 15.852924 17.003346 3.569498  |
| Ge 15.530834 14.651684 9.604445  | Ge 18.588722 16.035325 9.145296  |
| Ge 9.805292 11.926215 7.269594   | Si 18.798081 11.794764 8.706171  |
| Ge 11.690389 10.221612 8.194092  | Si 16.168118 18.764690 11.383194 |
| O 12.142676 13.863750 11.203504  | Ge 7.572929 9.421046 6.787457    |
| O 10.993537 15.494703 8.171305   | Ge 9.274197 7.593386 7.659408    |
| C 15.687471 10.536309 9.714668   | Si 10.634447 9.237443 3.871861   |
| C 10.995289 14.467524 11.887838  | Ge 7.735420 8.872749 9.471968    |
| C 12.943389 13.101106 12.170007  | Si 5.662676 12.555059 9.019290   |
| C 10.491568 15.732808 6.809497   | Si 11.003488 7.161320 11.518101  |
| C 10.892788 16.734161 8.949579   | C 17.618791 11.244390 11.997340  |
| Ge 14.512134 16.545405 7.816563  | C 18.110314 8.711982 10.310918   |
| Ge 16.168417 16.189243 5.849402  | Si 12.975696 9.616672 3.638383   |
| Ge 17.556184 13.834774 8.220903  | Si 16.962171 19.106410 3.304976  |
| Ge 16.289745 17.103560 9.610644  | Si 16.847725 15.352837 2.152127  |
| Ge 9.862313 11.248903 9.971999   | Si 13.526152 17.219078 3.117816  |
| Ge 10.112679 9.583666 6.230384   | Si 20.932601 12.359067 9.627741  |
| Ge 7.686669 11.278238 8.575504   | Si 19.050054 10.644974 6.628199  |
| Ge 10.300699 8.699558 9.758357   | Si 17.777726 20.470255 10.898844 |
| Si 17.509458 10.515757 10.245252 | Si 16.708652 17.645062 13.420630 |
| C 13.433680 11.258642 4.467869   | Si 13.979172 19.700844 11.445471 |
| C 10.988069 13.873648 13.292102  | Si 10.073756 6.971718 3.336255   |
| C 12.473806 13.571918 13.539189  | Si 9.358503 10.780383 2.568478   |
| C 9.725616 17.045048 6.888738    | Si 6.106181 14.124424 10.753122  |
| C 10.513376 17.822611 7.952542   | Si 3.955662 11.023732 9.706449   |
| Ge 18.575481 15.538436 6.553118  | Si 5.033932 13.630897 6.981277   |

Si 12.704335 5.777391 10.567140  
Si 9.124977 5.819113 12.155008  
Si 11.789991 8.350484 13.426546  
C 13.963546 8.224234 4.468178  
C 13.478755 9.700535 1.805219  
C 18.764687 19.049886 3.890514  
C 16.058489 20.477745 4.258411  
C 16.968290 19.563523 1.455880  
C 18.740531 15.501502 2.173695  
C 16.255601 15.564761 0.355041  
C 16.375375 13.611179 2.734025  
C 12.684968 18.318691 4.419177  
C 12.706288 15.505530 3.145858  
C 13.215219 17.999501 1.410753  
C 20.788549 13.419571 11.194187  
C 21.992976 13.294453 8.361177  
C 21.836400 10.751310 10.102654  
C 19.794855 11.782490 5.305436  
C 17.358649 10.040329 6.013410  
C 20.190262 9.131570 6.812863  
C 17.192112 21.558475 9.457650  
C 19.475817 19.750353 10.460955  
C 17.988295 21.571198 12.438383  
C 18.542856 17.162590 13.446497  
C 16.348014 18.760391 14.920397  
C 15.666802 16.066799 13.599096  
C 13.922956 21.246189 12.553272  
C 12.746449 18.432347 12.152550  
C 13.408084 20.192210 9.704283  
C 8.202574 6.677233 3.459818  
C 10.948881 5.735906 4.478754  
C 10.618798 6.604631 1.548654  
C 7.498643 10.600443 2.898232  
C 9.650964 10.498891 0.708164  
C 9.863562 12.562994 2.987018  
C 7.296792 15.466002 10.114621  
C 6.912654 13.275758 12.246749  
C 4.514016 14.983516 11.340569  
C 2.282633 11.933788 9.705346  
C 4.287335 10.382059 11.461694  
C 3.820402 9.541719 8.532730  
C 4.322413 12.367283 5.758006  
C 3.717382 14.968207 7.300981  
C 6.537733 14.466086 6.178152  
C 13.621193 4.815759 11.930697  
C 13.970041 6.823299 9.618912  
C 11.941435 4.526271 9.360300  
C 7.888706 6.829960 13.183501  
C 8.212616 5.076225 10.668369  
C 9.750285 4.370614 13.222524  
C 11.945780 7.201618 14.935141  
C 10.597436 9.758784 13.875764  
C 13.507415 9.094112 13.091046  
H 17.462806 9.591067 5.014059  
H 16.929188 9.279747 6.679465  
H 16.641325 10.869523 5.939462  
H 22.203221 12.680040 7.475452  
H 22.957237 13.574251 8.812295  
H 21.498521 14.215689 8.023484  
H 17.536884 18.835836 0.860860  
H 17.444793 20.546906 1.322333  
H 15.955403 19.621784 1.035955  
H 22.837008 10.991962 10.493453  
H 21.964920 10.075894 9.246640  
H 21.296921 10.201219 10.885730  
H 17.351922 12.309913 12.002913  
H 18.629822 11.148417 12.416258  
H 16.926755 10.714332 12.669449

H 2.994228 8.889106 8.854469  
H 3.624792 9.851567 7.497893  
H 4.742415 8.944472 8.534410  
H 20.228206 8.580873 5.860490  
H 21.217976 9.426533 7.065313  
H 19.839156 8.437896 7.588409  
H 11.599049 18.353277 4.241797  
H 13.064734 19.348270 4.382503  
H 12.864691 17.936962 5.434145  
H 14.141048 5.489942 12.625152  
H 14.378922 4.159270 11.475949  
H 12.941756 4.184582 12.518895  
H 10.985278 10.332785 14.731666  
H 10.458009 10.443776 13.026751  
H 9.606665 9.373400 14.150542  
H 12.891122 12.105528 4.026669  
H 13.196949 11.230132 5.541436  
H 14.511048 11.455664 4.367364  
H 16.767959 14.837554 -0.293346  
H 16.472408 16.569216 -0.033478  
H 15.175036 15.392020 0.258324  
H 9.697101 17.558177 5.920446  
H 8.691944 16.869038 7.216852  
H 18.831633 18.842455 4.967480  
H 19.343759 18.280634 3.363684  
H 19.243755 20.023654 3.704387  
H 18.412960 21.010120 13.282138  
H 17.039430 22.013119 12.770559  
H 18.680063 22.395640 12.207236  
H 10.398245 12.947934 13.311587  
H 10.563864 14.569010 14.026426  
H 7.764332 5.854827 10.036508  
H 8.878017 4.474108 10.036379  
H 7.401554 4.423351 11.026787  
H 14.721349 6.171300 9.148239  
H 14.497276 7.524496 10.279124  
H 13.484373 7.410074 8.827245  
H 9.218357 13.273257 2.447922  
H 10.903784 12.770411 2.703471  
H 9.761641 12.757237 4.064092  
H 10.712631 10.576177 0.439915  
H 9.100277 11.254432 0.127033  
H 9.294889 9.510343 0.388151  
H 19.136430 15.434936 3.196784  
H 19.081555 16.451047 1.739164  
H 19.186435 14.685040 1.585454  
H 3.379638 11.938054 6.123226  
H 5.024000 11.540332 5.581483  
H 4.117376 12.850207 4.790545  
H 11.344964 5.028538 8.585691  
H 12.737606 3.957070 8.856691  
H 11.290450 3.806584 9.875098  
H 4.104957 15.776305 7.936482  
H 2.824034 14.555804 7.788434  
H 3.401727 15.416815 6.346709  
H 7.527295 7.703455 12.623832  
H 8.330990 7.184480 14.124504  
H 7.017385 6.206991 13.436939  
H 7.176685 14.021269 13.012186  
H 6.237806 12.543083 12.708606  
H 7.826208 12.739732 11.950689  
H 2.289207 12.819210 10.354924  
H 1.495061 11.256181 10.069072  
H 1.998681 12.258766 8.695151  
H 11.416739 18.267146 7.513849  
H 9.927622 18.621410 8.423239  
H 13.841025 7.268819 3.940172  
H 13.651606 8.078949 5.511297

H 15.034689 8.474730 4.468401  
H 12.735495 12.031695 12.013615  
H 13.998264 13.313472 11.952830  
H 14.553246 22.050949 12.151240  
H 12.892791 21.629197 12.613623  
H 14.262508 21.031956 13.575539  
H 21.795204 13.649201 11.575892  
H 20.280627 14.371835 10.986384  
H 20.232925 12.905666 11.989323  
H 15.044379 20.645410 3.870592  
H 15.980512 20.232538 5.326233  
H 16.612618 21.424500 4.168690  
H 17.972820 8.203130 9.347289  
H 19.174259 8.647254 10.576460  
H 17.541034 8.152149 11.068022  
H 9.882452 14.862787 6.533648  
H 11.358903 15.808099 6.136773  
H 10.093148 14.224178 11.309627  
H 11.150940 15.556308 11.900571  
H 15.815425 15.399045 12.739283  
H 14.596635 16.306813 13.660204  
H 15.949278 15.522304 14.512960  
H 7.642125 7.296528 2.746692  
H 7.975813 5.622828 3.239799  
H 7.826849 6.901046 4.467630  
H 15.279618 19.005484 14.995617  
H 16.906532 19.704434 14.872916  
H 16.638018 18.244969 15.848728  
H 13.083212 14.873542 2.329878  
H 11.616421 15.592111 3.021917  
H 12.904492 14.978095 4.089195  
H 18.810214 16.564778 12.564366  
H 18.766010 16.564781 14.343087  
H 19.193425 18.047675 13.463980  
H 6.824763 16.074642 9.330532  
H 7.592360 16.142028 10.931541  
H 8.202438 15.011200 9.689104  
H 13.196407 8.791002 1.257730  
H 13.014167 10.556369 1.297459  
H 14.570198 9.816143 1.723389  
H 11.866164 16.908963 9.428583  
H 10.115971 16.585253 9.713014  
H 7.268263 10.706606 3.967341  
H 7.121097 9.621554 2.574076  
H 6.943944 11.375222 2.347233  
H 10.408873 3.703524 12.649593  
H 10.302465 4.711140 14.108135  
H 8.893594 3.772300 13.568793  
H 15.072390 9.956572 10.418363  
H 15.539942 10.116344 8.711326  
H 15.314756 11.571916 9.702157  
H 12.630771 12.806328 14.308189  
H 13.016446 14.478233 13.840333  
H 4.252980 11.189574 12.205818  
H 5.270008 9.895246 11.527267  
H 3.523917 9.639106 11.737895  
H 12.374303 7.755357 15.784621  
H 10.969058 6.811285 15.251699  
H 12.600808 6.344258 14.730005  
H 10.660459 4.710629 4.200795  
H 12.041587 5.811930 4.408025  
H 10.665488 5.893814 5.528642  
H 3.815102 14.265872 11.791804  
H 3.991381 15.488665 10.517456  
H 4.752255 15.739773 12.103912  
H 10.338592 5.574107 1.282604  
H 11.706778 6.696016 1.427678  
H 10.142624 7.279041 0.824734  
H 14.254859 8.308395 12.915795  
H 13.496515 9.744272 12.205916  
H 13.846684 9.690638 13.951732  
H 16.853188 12.856387 2.091463  
H 16.703250 13.436855 3.767938  
H 15.289878 13.451589 2.696939  
H 7.337322 13.737446 5.987295  
H 6.945441 15.256027 6.823920  
H 6.253264 14.924539 5.219072  
H 20.191788 20.570687 10.298502  
H 19.871043 19.108815 11.259649  
H 19.436012 19.151404 9.540854  
H 11.714563 18.805695 12.069302  
H 12.945651 18.234298 13.215057  
H 12.814538 17.476585 11.614598  
H 12.134458 18.025868 1.202982  
H 13.698334 17.433280 0.603494  
H 13.586585 19.032401 1.364971  
H 14.054112 20.969038 9.274087  
H 13.433656 19.329422 9.023030  
H 12.380274 20.584903 9.732963  
H 17.958672 22.313749 9.226848  
H 17.025435 20.960085 8.551299  
H 16.259821 22.089384 9.694165  
H 20.805732 12.116216 5.574971  
H 19.180085 12.680781 5.157127  
H 19.859712 11.249135 4.344811

#### 4. [Eu(Ge<sub>9</sub>Hyp<sub>3</sub>)<sub>2</sub>]

Figure S14. Geometry optimized structure

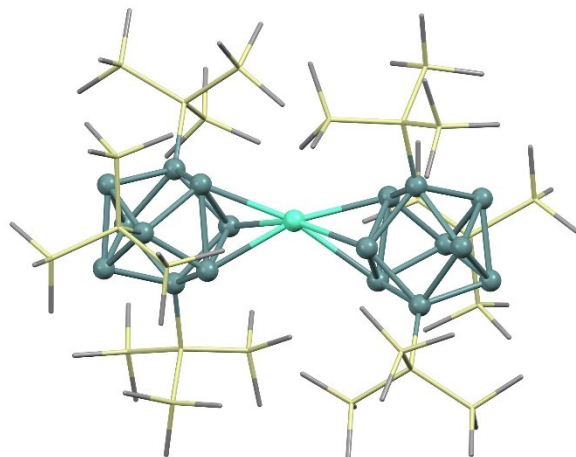

Point group:

C1

Energy:

-47208.24296914469 Hartree

HOMO-LUMO-gap:

0.724 eV

Atomic coordinates:

|                                  |                                 |
|----------------------------------|---------------------------------|
| Ge 1.285331 -0.907366 6.351927   | C -6.394709 -3.578650 -6.588345 |
| Ge 0.274460 1.534631 6.014373    | C -3.980008 -4.589790 -2.850430 |
| Ge -1.352861 -0.711998 6.049755  | C -6.680269 -3.162018 -2.412230 |
| Ge 2.174230 0.592048 4.430986    | C -4.121788 -2.081407 -1.074555 |
| Ge 0.096995 -2.250869 4.467364   | Si -5.787540 0.433907 -4.520189 |
| Ge -1.678373 1.214523 4.365829   | C -5.244825 1.700195 -5.821579  |
| Ge 1.363928 -1.010734 2.569965   | C -7.596174 -0.042384 -4.872641 |
| Ge 0.376568 1.521705 2.873168    | C -5.709344 1.263501 -2.811828  |
| Si 4.356230 1.678577 4.527076    | C -0.940429 -5.099113 1.170003  |
| Ge -1.333126 -0.844720 2.886072  | C 1.981965 -5.143264 2.158369   |
| Si -0.501634 -4.613398 4.628680  | C 0.130020 -7.530403 2.740622   |
| Si -3.579963 2.715094 4.219395   | C -3.336692 -6.697026 4.680970  |
| Eu -0.427318 0.314011 0.054595   | C -3.336533 -4.410729 6.747414  |
| Ge -0.332046 -1.467016 -2.653482 | C -3.854157 -3.804125 3.771595  |
| Ge 1.355873 0.670493 -2.638414   | C 0.161953 -7.272198 6.830864   |
| Ge -1.400819 1.107066 -2.928228  | C 2.586971 -5.500190 6.117861   |
| Ge 1.621038 -1.265093 -4.307935  | C 0.433198 -4.466607 8.061268   |
| Ge -2.063535 -0.852972 -4.447643 | H -4.405733 -5.151925 -3.692485 |
| Ge 0.367593 2.216893 -4.422622   | H -4.121597 -5.190830 -1.939856 |
| Ge -0.217297 -1.473674 -6.156976 | H -2.900085 -4.487240 -3.022610 |
| Ge 1.403429 0.592923 -6.141668   | H -3.028803 -1.981571 -1.148912 |
| Si 3.464037 -2.856378 -4.348218  | H -4.548217 -1.082630 -0.911040 |
| Ge -1.275732 1.031685 -6.061460  | H -4.347091 -2.698741 -0.192540 |
| Si -4.404813 -1.514731 -4.552650 | H -7.201465 -2.218492 -2.200274 |
| Si 0.700372 4.624210 -4.485916   | H -7.144754 -3.610319 -3.300706 |
| Si -4.683549 -2.745088 -6.585573 | H -6.857450 -3.838999 -1.562676 |
| Si -4.811063 -2.895807 -2.646641 | H -3.396010 -4.813025 -5.938349 |
| Si 0.201752 -5.635175 2.589040   | H -3.524700 -4.647775 -7.703877 |
| Si 0.724445 -5.485975 6.487990   | H -2.352843 -3.662613 -6.798341 |
| Si -2.852279 -4.878933 4.972052  | H -6.545704 -4.111103 -7.539792 |
| C -4.572234 -1.584127 -8.083381  | H -7.209801 -2.851081 -6.477763 |
| C -3.363286 -4.093268 -6.766798  | H -6.489257 -4.314252 -5.777771 |

H -5.385553 -0.845683 -8.089940  
H -4.641371 -2.166372 -9.014763  
H -3.619359 -1.037685 -8.098090  
H -6.098104 0.605194 -2.022924  
H -4.673692 1.529845 -2.557269  
H -6.310536 2.185198 -2.810727  
H -8.236975 0.849074 -4.794011  
H -7.974573 -0.791965 -4.164963  
H -7.715193 -0.446937 -5.887230  
H -5.887795 2.591894 -5.767389  
H -4.205555 2.018915 -5.662590  
H -5.313536 1.294080 -6.839212  
H 2.079402 -4.054724 2.043881  
H 2.278756 -5.613187 1.208664  
H 2.692167 -5.462882 2.932210  
H -0.582906 -5.514494 0.216175  
H -0.967991 -4.004854 1.071527  
H -1.970286 -5.448450 1.325950  
H 0.401763 -7.990123 1.778154  
H 0.835747 -7.899625 3.496894  
H -0.872098 -7.887475 3.012475  
H -3.624545 -2.737995 3.907993  
H -3.642811 -4.059060 2.724602  
H -4.931249 -3.947544 3.948056  
H -2.768809 -7.383017 5.323625  
H -4.405920 -6.839771 4.899820  
H -3.167482 -6.995456 3.637373  
H -4.427482 -4.487550 6.870944  
H -3.040275 -3.379714 6.985001  
H -2.868995 -5.077283 7.484759  
H -0.628278 -4.431004 8.338990  
H 0.783440 -3.431544 7.940647  
H 0.988363 -4.914056 8.899996  
H 2.954442 -4.495074 5.871097  
H 3.141471 -5.854688 7.000105  
H 2.831115 -6.166362 5.279404  
H -0.894861 -7.310951 7.128441  
H 0.289093 -7.922536 5.955222  
H 0.755261 -7.697511 7.654711  
Si 4.566909 -2.638270 -6.460637  
Si -0.305027 5.487279 -6.474943  
Si 4.931338 -2.327663 -2.541484  
Si -0.283078 5.555768 -2.521739  
Si 4.687913 2.959290 2.540978  
Si -4.508032 2.407902 2.036524  
Si 4.483918 3.042713 6.486377  
Si -5.118337 2.086888 5.936858  
Si 5.906578 -0.140238 4.639794  
Si -2.753592 4.942636 4.486798  
C 3.436403 -3.219144 -7.871230  
C 0.603535 4.841066 -8.011059  
C 5.094341 -0.849882 -6.806397  
C -2.132550 4.998531 -6.601020  
C 6.133998 -3.718887 -6.457894  
C -0.196509 7.387293 -6.452693  
C 5.846094 -0.697117 -2.874465  
C -2.169113 5.689533 -2.698028  
C 6.219401 -3.711224 -2.322410  
C 0.415104 7.294851 -2.194892  
C 3.961412 -2.153353 -0.922317  
C 0.088570 4.462243 -1.011769  
Si 2.514679 -5.035708 -4.103216  
Si 3.071554 4.932982 -4.473864  
C 1.045954 -5.275044 -5.278833  
C 3.906449 3.885586 -5.815641  
C 3.811165 -6.376081 -4.485439  
C 3.504751 6.759328 -4.785946  
C 1.901265 -5.294992 -2.324477  
C 3.775297 4.423080 -2.784734  
C 4.167290 1.972408 1.007879  
C -3.128719 1.898444 0.809960

C 3.672175 4.562701 2.596851  
C -5.799479 1.018854 2.002201  
C 6.527115 3.414129 2.363630  
C -5.322784 4.001304 1.401353  
C 7.651246 0.491070 5.063126  
C -4.206130 6.168474 4.569586  
C 5.389926 -1.395413 5.965224  
C -1.739632 5.110052 6.078662  
C 5.983233 -1.036572 2.966210  
C -1.651452 5.399257 3.009156  
C 6.146806 3.969576 6.491970  
C -6.735820 3.066884 5.729335  
C 3.098958 4.337549 6.543788  
C -5.506107 0.233671 5.849076  
C 4.380161 1.973967 8.051813  
C -4.382145 2.475441 7.641636  
H 6.518224 -0.777650 -3.739201  
H -2.452830 6.388850 -3.495800  
H 6.455829 -0.422850 -2.000133  
H -2.610622 6.056377 -1.759092  
H 5.142454 0.123890 -3.066510  
H -2.619294 4.713853 -2.926677  
H 3.239709 -1.326306 -0.983433  
H -0.380358 3.476247 -1.155655  
H 3.406291 -3.067167 -0.673354  
H 1.165542 4.307273 -0.865804  
H 4.649862 -1.939292 -0.091200  
H -0.321791 4.912197 -0.095913  
H 5.744638 -4.665696 -2.056874  
H 1.493244 7.265964 -1.986946  
H 6.811270 -3.872314 -3.233226  
H 0.254802 7.966503 -3.049226  
H 6.914622 -3.448304 -1.510805  
H -0.081995 7.740323 -1.319939  
H 5.779348 -0.468290 -6.037668  
H -2.718523 5.377815 -5.753461  
H 5.611391 -0.797171 -7.776712  
H -2.563981 5.414000 -7.524413  
H 4.226506 -0.176857 -6.848418  
H -2.252406 3.906474 -6.633681  
H 6.616918 -3.672618 -7.446006  
H -0.624950 7.796141 -7.380513  
H 5.912071 -4.771853 -6.240846  
H 0.840681 7.740632 -6.379009  
H 6.863342 -3.368474 -5.714927  
H -0.757800 7.815273 -5.610771  
H 3.187484 -4.285434 -7.782395  
H 1.646572 5.183707 -8.042684  
H 3.939926 -3.072287 -8.838971  
H 0.104222 5.202384 -8.923049  
H 2.494436 -2.653899 -7.891444  
H 0.608127 3.742918 -8.042221  
H 2.729153 -5.271536 -1.602462  
H 3.401639 5.067530 -1.977254  
H 1.176519 -4.521476 -2.035338  
H 3.509052 3.384887 -2.542484  
H 1.406668 -6.274535 -2.238268  
H 4.873183 4.499481 -2.794227  
H 3.378636 -7.372235 -4.305574  
H 4.594205 6.900544 -4.718913  
H 4.705268 -6.279727 -3.855137  
H 3.033696 7.427653 -4.053011  
H 4.133244 -6.339161 -5.534942  
H 3.189066 7.081354 -5.787366  
H 0.614465 -6.278612 -5.142842  
H 4.997665 4.022975 -5.771779  
H 0.257007 -4.535620 -5.084081  
H 3.692615 2.816044 -5.683036  
H 1.342078 -5.173976 -6.331399  
H 3.570921 4.168077 -6.822221  
H 2.605076 4.351057 2.748236

H -5.374308 0.062908 2.336288  
H 3.779291 5.108255 1.647343  
H -6.177248 0.882668 0.977882  
H 4.004754 5.227923 3.404978  
H -6.658294 1.251232 2.646086  
H 4.330429 2.570180 0.098449  
H -3.498923 1.892795 -0.224859  
H 3.101214 1.708073 1.052540  
H -2.839948 0.873117 1.105521  
H 4.736218 1.038964 0.907731  
H -2.260550 2.571620 0.885714  
H 6.672233 4.041961 1.471381  
H -5.746839 3.831016 0.400536  
H 6.898976 3.974325 3.232047  
H -6.139974 4.321479 2.062112  
H 7.154140 2.519755 2.247108  
H -4.606363 4.829908 1.326192  
H 4.987468 -1.377375 2.650572  
H -0.819721 4.688871 2.901875  
H 6.385520 -0.387170 2.176643  
H -2.216181 5.406083 2.066829  
H 6.635814 -1.919776 3.039575  
H -1.223450 6.403150 3.150881  
H 7.688529 0.931890 6.068615  
H -4.840687 5.983198 5.446797  
H 8.364679 -0.346906 5.040707  
H -3.819985 7.196033 4.649834

H 8.001496 1.249151 4.349873  
H -4.841544 6.118804 3.675540  
H 6.103480 -2.233197 5.987287  
H -1.336355 6.130994 6.155781  
H 4.391392 -1.804620 5.758765  
H -0.894189 4.408286 6.095540  
H 5.363045 -0.946495 6.966697  
H -2.349544 4.919790 6.971754  
H 5.223662 1.274269 8.125588  
H -4.224261 3.553148 7.783542  
H 3.451767 1.386958 8.077408  
H -3.417411 1.970103 7.786587  
H 4.397973 2.615464 8.945999  
H -5.065230 2.129943 8.432295  
H 2.107012 3.864404 6.561619  
H -4.593153 -0.366216 5.967931  
H 3.200215 4.946618 7.455032  
H -6.199324 -0.040836 6.658626  
H 3.135159 5.012998 5.678935  
H -5.972687 -0.044503 4.895170  
H 7.004268 3.284858 6.454405  
H -6.567469 4.150588 5.785183  
H 6.229653 4.657841 5.639478  
H -7.225014 2.852460 4.769130  
H 6.233777 4.567688 7.411948  
H -7.441222 2.794706 6.529105

## References

- (1) Girard, P.; Namy, J.-L.; Kagan, H. B. *J. Am. Chem. Soc.* **1980**, *102*, 2693-2698.
- (2) *Synthetic Methods of Organometallic and Inorganic Chemistry* (Eds.: W. A. Herrmann, G. Brauer), Georg Thieme Verlag, Thieme Medical Publishers, Stuttgart, **1996**.
- (3) Li, F.; Sevov, S. C. *Inorg. Chem.* **2012**, *51*, 2706-2708.
- (4) Kysliak, O.; Schnepf, A. *Dalton Trans.* **2016**, *45*, 2404-2408.
- (5) (a) Sheldrick, G. M. *Acta Crystallogr. Sect. A* **2008**, *64*, 112-122; (b) Sheldrick, G. M. *Acta Crystallogr. Sect. C* **2015**, *71*, 3-8.
- (6) Dolomanov, O. V.; Bourhis, L. J.; Gildea, R. J.; Howard, J. A. K.; Puschmann, H. *J. Appl. Crystallogr.* **2009**, *42*, 339-341.
- (7) Spek, A. L. *Acta Cryst.* **2009**, D65, 148 - 155.
- (8) Kahn, O. *Molecular magnetism*, VCH Publishers, Inc.(USA), **1993**.
- (9) Chilton, N. F.; Anderson, R. P.; Turner, L. D.; Soncini, A.; Murray, K. S. *J. Comput. Chem.* **2013**, *34*, 1164-1175.
- (10) Eichkorn, K.; Treutler, O.; Öhm, H.; Häser, M.; Ahlrichs, R. *Chem. Phys. Lett.* **1995**, *240*, 283-290.
- (11) Treutler, O.; Ahlrichs, R. *J. Chem. Phys.* **1995**, *102*, 346-354.
- (12) (a) Perdew, J. P. *Phys. Rev. B* **1986**, *33*, 8822-88824; (b) Becke, A. D. *Phys. Rev. A* **1988**, *38*, 3098-3100.
- (13) Schäfer, A.; Horn, H.; Ahlrichs, R. *J. Chem. Phys.* **1992**, *97*, 2571-2577.
- (14) Steffen, C.; Thomas, K.; Huniar, U.; Hellweg, A.; Rubner, O.; Schroer, A. *J. Comput. Chem.* **2010**, *31*, 2967-2970.
- (15) (a) Xémard, M.; Goudy, V.; Braun, A.; Tricoire, M.; Cordier, M.; Ricard, L.; Castro, L.; Louyriac, E.; Kefalidis, C. E.; Clavaguéra, C.; Maron, L.; Nocton, G. Reductive Disproportionation of CO<sub>2</sub> with Bulky Divalent Samarium Complexes; *Organometallics* **2017**, *36*, 4660-4668. (b) Sitzmann, H.; Dezember, T.; Schmitt, O.; Weber, F.; Wolmershäuser, G.; Ruck, M. Metallocenes of Samarium, Europium, and Ytterbium with the Especially Bulky Cyclopentadienyl Ligands C<sub>5</sub>H(CHMe<sub>2</sub>)<sub>4</sub>, C<sub>5</sub>H<sub>2</sub>(CMe<sub>3</sub>)<sub>3</sub>, and C<sub>5</sub>(CHMe<sub>2</sub>)<sub>5</sub>; *Z. Anorg. Allg. Chem.* **2000**, *626*, 2241-2244. (c) Visseaux, M.; Barbier-Baudry, D.; Blacque, O.; Hafid, A.; Richard, P.; Weber, F. New base-free metallocenes of samarium and neodymium, an approach to stereoelectronic control in organolanthanide chemistry; *New J. Chem.* **2000**, *24*, 939-942. (d) Nocton, G.; Ricard, L. N-aromatic heterocycle adducts of bulky [1,2,4-(Me<sub>3</sub>C)<sub>3</sub>C<sub>5</sub>H<sub>2</sub>]<sub>2</sub>Sm: synthesis, structure and solution analysis; *Dalton Trans.* **2014**, *43*, 4380-4387. (e) Evans, W. J.; Hughes, L. A.; Hanusa, T. P. Synthesis and crystallographic characterization of an unsolvated, monomeric samarium bis(pentamethylcyclopentadienyl) organolanthanide complex, (C<sub>5</sub>Me<sub>5</sub>)<sub>2</sub>Sm; *J. Am. Chem. Soc.* **1984**, *106*, 4270-4272. (f) Evans, W. J.; Perotti, J. M.; Brady, J. C.; Ziller, J. W. Tethered Olefin Studies of Alkene versus Tetraphenylborate Coordination and Lanthanide Olefin Interactions in Metallocenes; *J. Am. Chem. Soc.* **2003**, *125*, 5204-5212. (g) Evans, W. J.; Hughes, L. A.; Hanusa, T. P. Synthesis and x-ray crystal structure of bis (pentamethylcyclopentadienyl) complexes of samarium and europium: (C<sub>5</sub>Me<sub>5</sub>)<sub>2</sub>Sm and (C<sub>5</sub>Me<sub>5</sub>)<sub>2</sub>Eu; *Organometallics* **1986**, *5*, 1285-1291. (h) Weber, F.; Sitzmann, H.; Schultz, M.; Sofield, C. D.; Andersen, R. A. Synthesis and Solid State Structures of Sterically Crowded d<sup>0</sup>-Metallocenes of Magnesium, Calcium, Strontium, Barium, Samarium, and Ytterbium; *Organometallics* **2002**, *21*, 3139-3146. (i) Kuiper, M. H.; Lueken, H. Synthesis, Structure and Magnetism of Bis [1,2,4-tris(trimethylsilyl)cyclopentadienyl] europium; *Z. Anorg. Allg. Chem.* **2007**, *633*, 1407-1409. (j) Schultz, M.; Burns, C. J.; Schwartz, D. J.; Andersen, R. A. Solid-State Structures of Base-Free Ytterbocenes and Inclusion Compounds of Bis(pentamethylcyclopentadienyl)ytterbium with Neutral Carboranes and Toluene: The Role of Intermolecular Contacts; *Organometallics* **2000**, *19*, 781-789. (k) Palumbo, C. T.; Ziller, J. W.; Evans, W. J. Structural characterization of the bent metallocenes, [C<sub>5</sub>H<sub>3</sub>(SiMe<sub>3</sub>)<sub>2</sub>]<sub>2</sub>Sm and [C<sub>5</sub>H<sub>3</sub>(CMe<sub>3</sub>)<sub>2</sub>]<sub>2</sub>Ln (Ln = Eu, Sm), and the mono(cyclopentadienyl) tetraphenylborate complex, [C<sub>5</sub>H<sub>3</sub>(CMe<sub>3</sub>)<sub>2</sub>]Eu(μ-η<sup>6</sup>:η<sup>1</sup>-Ph)<sub>2</sub>BPh<sub>2</sub>; *J. Organomet. Chem.* **2018**, *867*, 142-148.
- (16) (a) Kelly, R. P.; M. Bell, T. D.; Cox, R. P.; Daniels, D. P.; Deacon, G. B.; Jaroschik, F.; Junk, P. C.; Le Goff, X. F.; Lemercier, G.; Martinez, A.; Wang, J.; Werner, D. Divalent Tetra- and Penta-phenylcyclopentadienyl Europium and



Samarium Sandwich and Half-Sandwich Complexes: Synthesis, Characterization, and Remarkable Luminescence Properties; *Organometallics* **2015**, *34*, 5624-5636. (b) van Velzen, N. J. C.; Harder, S. Deca-arylsamarocene: an unusually inert Sm (II) sandwich complex; *Organometallics* **2018**, *37*, 2263-2271. (c) Ruspic, C.; Moss, J. R.; Schürmann, M.; Harder, S. Remarkable Stability of Metallocenes with Superbulky Ligands: Spontaneous Reduction of Sm<sup>III</sup> to Sm<sup>II</sup>; *Angew. Chem. Int. Ed.* **2008**, *47*, 2121-2126. (d) Harder, S.; Naglav, D.; Ruspic, C.; Wickleder, C.; Adlung, M.; Hermes, W.; Eul, M.; Pöttgen, R.; Rego, D. B.; Poineau, F. Czerwinski, K. R.; Herber, R. H.; Nowik, I. Physical Properties of Superbulky Lanthanide Metallocenes: Synthesis and Extraordinary Luminescence of [Eu<sup>II</sup>(Cp<sup>BIG</sup>)<sub>2</sub>] (Cp<sup>BIG</sup>=(4-*n*Bu-C<sub>6</sub>H<sub>4</sub>)<sub>5</sub>-Cyclopentadienyl); *Chem. Eur. J.* **2013**, *19*, 12272-12280. (e) Deacon, G. B.; Forsyth, C. M.; Jaroschik, F.; Junk, P. C.; Kay, D. L.; Maschmeyer, T.; Masters, A. F.; Wang, J.; Field, L. D. Accessing Decaphenylmetallocenes of Ytterbium, Calcium, and Barium by Desolvation of Solvent-Separated Ion Pairs: Overcoming Adverse Solubility Properties; *Organometallics* **2008**, *27*, 4772-4778.
